# Supplementary material
Source: PubMed Central journal article supplement (PMC4817932)
Supplement: tria020305.ww1_default.pdf [file tria020305.ww1_default.pdf]

## List of Appendices

|                                                                                                              |    |
|--------------------------------------------------------------------------------------------------------------|----|
| Appendix 1   Appraisal of randomized clinical trials using the Cochrane risk-of-bias tool .....              | 2  |
| Appendix 2   Aggregate of Cochrane risk-of-bias results .....                                                | 3  |
| Appendix 3   Appraisal of reporting of adverse drug reactions, according to McHarm tool .....                | 4  |
| Appendix 4   Aggregate of appraisal of reporting of adverse drug reactions, according to McHarm tool ...     | 5  |
| Appendix 5   Appraisal of the cohort study using the Newcastle Ottawa scale .....                            | 6  |
| Appendix 6   Appraisal of cost-effectiveness studies using the Drummond tool .....                           | 7  |
| Appendix 7   Patient characteristics .....                                                                   | 8  |
| Appendix 8   Network geometry for glycosylated hemoglobin .....                                              | 10 |
| Appendix 9   Risk of Bias (RoB) for glycosylated hemoglobin .....                                            | 11 |
| Appendix 11   Random effects pairwise meta-analysis for glycosylated hemoglobin .....                        | 13 |
| Appendix 12   Comparison adjusted funnel plot for glycosylated hemoglobin .....                              | 14 |
| Appendix 13   Comparison adjusted funnel plot for glycosylated hemoglobin .....                              | 15 |
| Appendix 14   Loop-Specific Method for glycosylated hemoglobin .....                                         | 16 |
| Appendix 15   Treatment Ranking: Probabilities of being the best for glycosylated hemoglobin .....           | 17 |
| Appendix 16   Surface under the cumulative ranking curve for glycosylated hemoglobin .....                   | 18 |
| Appendix 17   Network geometry for body weight .....                                                         | 19 |
| Appendix 18   Risk of Bias (RoB) for body weight .....                                                       | 20 |
| Appendix 20   Random Effects Pairwise Meta-analysis for body weight .....                                    | 22 |
| Appendix 21   Comparison adjusted funnel plot for body weight .....                                          | 23 |
| Appendix 22   Loop-Specific method for body weight .....                                                     | 24 |
| Appendix 23   Network Meta-analysis estimates for body weight .....                                          | 25 |
| Appendix 24   Treatment Ranking: Probabilities of being the best for body weight .....                       | 26 |
| Appendix 25   Surface under the cumulative ranking curve for body weight .....                               | 27 |
| Appendix 26   Network geometry for severe hypoglycemia .....                                                 | 28 |
| Appendix 27   Risk of Bias (RoB) for hypoglycemia .....                                                      | 29 |
| Appendix 29   Random Effects Pairwise Meta-analysis for severe hypoglycemia .....                            | 31 |
| Appendix 30   Comparison adjusted funnel plot for severe hypoglycemia .....                                  | 32 |
| Appendix 31   Comparison adjusted funnel plot for severe hypoglycemia .....                                  | 33 |
| Appendix 32   Loop-Specific method for severe hypoglycemia .....                                             | 34 |
| Appendix 33   Network meta-analysis estimates for severe hypoglycemia .....                                  | 35 |
| Appendix 34   Treatment Ranking: Probabilities of being the best for severe hypoglycemia .....               | 36 |
| Appendix 35   Treatment Ranking: Probabilities of being the best for severe hypoglycemia .....               | 37 |
| Appendix 36   Definitions of severe hypoglycemia .....                                                       | 38 |
| Appendix 37   Randomized clinical trials included in our review versus previous reviews .....                | 40 |
| Appendix 38   Randomized clinical trials excluded in our review that were included in previous reviews ..... | 41 |

| <b>Appendix 1   Appraisal of randomized clinical trials using the Cochrane risk-of-bias tool<sup>13</sup></b> |          |          |          |          |          |          |          |
|---------------------------------------------------------------------------------------------------------------|----------|----------|----------|----------|----------|----------|----------|
| <b>Study</b>                                                                                                  | <b>1</b> | <b>2</b> | <b>3</b> | <b>4</b> | <b>5</b> | <b>6</b> | <b>7</b> |
| Mathiesen, <sup>29</sup> 2012                                                                                 | Low      | Unclear  | Low      | Low      | Low      | Unclear  | High     |
| Renard, <sup>30</sup> 2011                                                                                    | Unclear  | Unclear  | Low      | Low      | Low      | Unclear  | High     |
| Zachariah, <sup>31</sup> 2011                                                                                 | Unclear  | Unclear  | Low      | Low      | Low      | Low      | Unclear  |
| Bolli, <sup>35</sup> 2009                                                                                     | Unclear  | Unclear  | Low      | Low      | High     | Unclear  | High     |
| Heller, <sup>32</sup> 2009                                                                                    | Low      | Low      | Low      | Low      | Low      | Unclear  | High     |
| Le Floch, <sup>33</sup> 2009                                                                                  | Low      | Low      | Low      | Low      | Low      | Low      | High     |
| Bartley, <sup>34</sup> 2008                                                                                   | Low      | High     | Low      | Low      | High     | Unclear  | High     |
| Chatterjee, <sup>36</sup> 2007                                                                                | Unclear  | Low      | Low      | Low      | Low      | Unclear  | Unclear  |
| Pesic, <sup>37</sup> 2007                                                                                     | Unclear  | Unclear  | Low      | Low      | Unclear  | Unclear  | Unclear  |
| Philippo, <sup>38</sup> 2007 <sup>a</sup>                                                                     | Unclear  | Unclear  | Low      | Low      | Low      | Unclear  | Unclear  |
| Pieber, <sup>39</sup> 2007                                                                                    | Low      | Unclear  | Low      | Low      | Low      | Unclear  | High     |
| Radman, <sup>40</sup> 2007                                                                                    | Unclear  | Unclear  | Low      | Low      | Unclear  | Unclear  | Low      |
| Ashwell, <sup>41</sup> 2006                                                                                   | Low      | Unclear  | Low      | Low      | Low      | Unclear  | Unclear  |
| Kolendorf, <sup>42</sup> 2006                                                                                 | Unclear  | Unclear  | Low      | Low      | Low      | Unclear  | High     |
| De Leeuw, <sup>43</sup> 2005                                                                                  | Unclear  | Unclear  | Low      | Unclear  | Low      | Unclear  | High     |
| Fulcher, <sup>44</sup> 2005                                                                                   | Unclear  | Unclear  | Low      | Low      | High     | Unclear  | Unclear  |
| Pieber, <sup>45</sup> 2005                                                                                    | Low      | Unclear  | Low      | Low      | Unclear  | Unclear  | High     |
| Home, <sup>46</sup> 2004                                                                                      | Unclear  | Low      | Low      | Low      | Low      | Unclear  | High     |
| Porcellati, <sup>47</sup> 2004                                                                                | Low      | Low      | Low      | Low      | Low      | Unclear  | Low      |
| Russell-Jones, <sup>48</sup> 2004                                                                             | Low      | High     | Low      | Low      | High     | Low      | Unclear  |
| Standl, <sup>49</sup> 2004                                                                                    | Unclear  | Unclear  | Low      | Low      | High     | Unclear  | High     |
| Rossetti, <sup>50</sup> 2003                                                                                  | Unclear  | Unclear  | Low      | Low      | Unclear  | Unclear  | Low      |
| Vague, <sup>51</sup> 2003                                                                                     | Low      | Unclear  | Low      | Low      | Low      | Unclear  | High     |
| Pieber, <sup>52</sup> 2000                                                                                    | Unclear  | Unclear  | Low      | Low      | Low      | Unclear  | High     |
| Raskin, <sup>53</sup> 2000                                                                                    | Low      | High     | Low      | Low      | Low      | Unclear  | High     |
| Ratner, <sup>54</sup> 2000<br>(CR: Hershon, <sup>66</sup> 2004)                                               | Unclear  | Unclear  | Low      | Low      | High     | Unclear  | High     |
| Rosenstock, <sup>55</sup> 2000                                                                                | Unclear  | Unclear  | Low      | Low      | Low      | Unclear  | Unclear  |

**Items:**

1. Random sequence generation
2. Allocation concealment
3. Blinding of participants and personnel
4. Blinding of outcome assessment
5. Incomplete outcome data
6. Selective reporting
7. Other bias

CR - companion report. High - high risk. Low - low risk. Unclear - unclear risk.

<sup>a</sup>Unpublished data.

---

**Appendix 2 | Aggregate of Cochrane risk-of-bias results<sup>13</sup>**

---

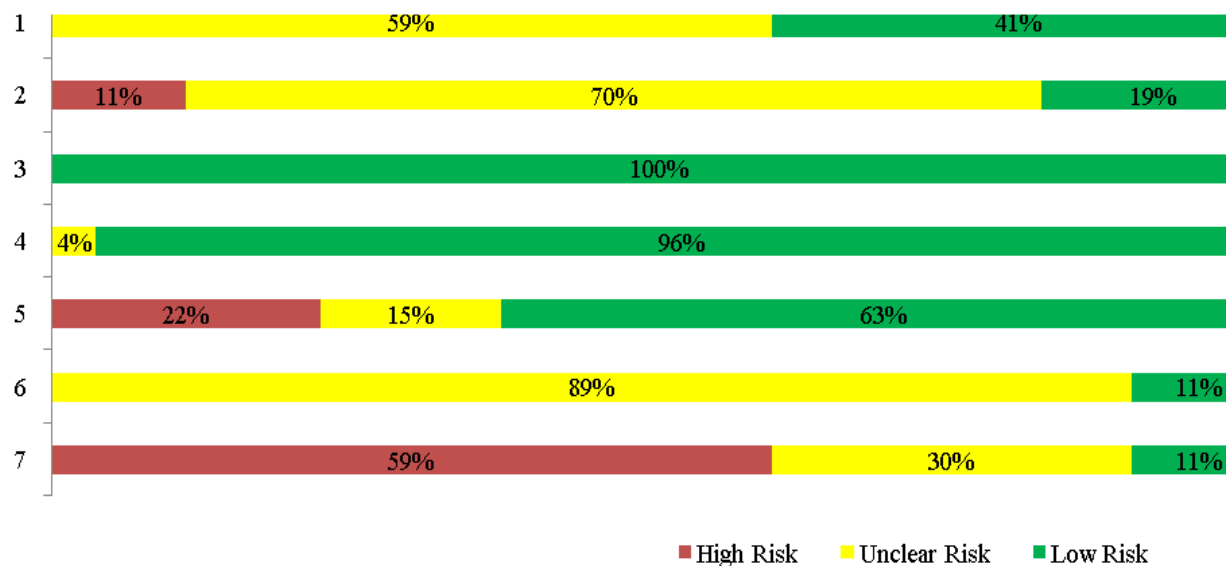

---

**Items:**

1. Random sequence generation
  2. Allocation concealment
  3. Blinding of participants and personnel
  4. Blinding of outcome assessment
  5. Incomplete outcome data
  6. Selective reporting
  7. Other bias
-

| <b>Appendix 3   Appraisal of reporting of adverse drug reactions, according to McHarm tool<sup>15</sup></b> |          |          |          |          |          |          |          |          |          |           |           |           |           |           |           |
|-------------------------------------------------------------------------------------------------------------|----------|----------|----------|----------|----------|----------|----------|----------|----------|-----------|-----------|-----------|-----------|-----------|-----------|
| <b>Study</b>                                                                                                | <b>1</b> | <b>2</b> | <b>3</b> | <b>4</b> | <b>5</b> | <b>6</b> | <b>7</b> | <b>8</b> | <b>9</b> | <b>10</b> | <b>11</b> | <b>12</b> | <b>13</b> | <b>14</b> | <b>15</b> |
| Mathiesen, <sup>29</sup> 2012                                                                               | Y        | N        | N        | Y        | N        | N        | N        | N        | N        | N         | Y         | Y         | Y         | Y         | N         |
| Renard, <sup>30</sup> 2011                                                                                  | Y        | N        | Y        | Y        | N        | N        | N        | N        | N        | N         | Y         | Y         | Y         | N         | N         |
| Zachariah, <sup>31</sup> 2011                                                                               | N        | N        | N        | N        | Y        | N        | N        | N        | Y        | N         | N         | Y         | N         | N         | N         |
| Heller, <sup>32</sup> 2009                                                                                  | Y        | Y        | Y        | N        | N        | N        | N        | N        | N        | N         | Y         | Y         | Y         | Y         | Y         |
| Le Floch, <sup>33</sup> 2009                                                                                | N        | N        | Y        | N        | N        | Y        | N        | N        | Y        | N         | Y         | N         | N         | Y         | N         |
| Bartley, <sup>34</sup> 2008                                                                                 | Y        | N        | N        | Y        | N        | N        | N        | N        | N        | N         | N         | Y         | Y         | N         | N         |
| Chatterjee, <sup>36</sup> 2007                                                                              | Y        | N        | Y        | N        | Y        | N        | Y        | N        | U        | N         | U         | U         | U         | N         | Y         |
| Philippo, <sup>38</sup> 2007 <sup>a</sup>                                                                   | N        | N        | N        | Y        | N        | N        | N        | N        | N        | N         | N         | N         | N         | N         | N         |
| Pieber, <sup>39</sup> 2007                                                                                  | Y        | N        | Y        | N        | N        | N        | N        | N        | Y        | N         | U         | Y         | Y         | Y         | U         |
| Ashwell, <sup>41</sup> 2006                                                                                 | Y        | N        | Y        | Y        | Y        | N        | N        | N        | Y        | N         | Y         | Y         | Y         | Y         | Y         |
| Kolendorf, <sup>42</sup> 2006                                                                               | Y        | N        | Y        | Y        | N        | Y        | N        | N        | N        | N         | Y         | Y         | Y         | Y         | Y         |
| De Leeuw, <sup>43</sup> 2005                                                                                | Y        | Y        | Y        | N        | N        | N        | N        | N        | N        | N         | Y         | Y         | Y         | N         | Y         |
| Fulcher, <sup>44</sup> 2005                                                                                 | Y        | Y        | Y        | N        | N        | N        | N        | N        | N        | N         | Y         | Y         | Y         | Y         | N         |
| Pieber, <sup>45</sup> 2005                                                                                  | Y        | N        | N        | Y        | N        | N        | N        | N        | N        | N         | Y         | Y         | Y         | Y         | N         |
| Home, <sup>46</sup> 2004                                                                                    | Y        | N        | N        | N        | N        | N        | N        | N        | N        | N         | N         | Y         | N         | N         | N         |
| Porcellati, <sup>47</sup> 2004                                                                              | U        | N        | N        | N        | N        | N        | N        | N        | Y        | N         | U         | Y         | Y         | U         | N         |
| Russell-Jones, <sup>48</sup> 2004                                                                           | Y        | Y        | N        | N        | N        | N        | N        | N        | Y        | N         | Y         | Y         | Y         | Y         | N         |
| Standl, <sup>49</sup> 2004                                                                                  | Y        | N        | N        | N        | Y        | Y        | N        | N        | Y        | N         | N         | Y         | Y         | N         | N         |
| Vague, <sup>51</sup> 2003                                                                                   | Y        | N        | N        | N        | N        | N        | N        | N        | N        | N         | N         | Y         | Y         | Y         | N         |
| Raskin, <sup>53</sup> 2000                                                                                  | Y        | N        | Y        | Y        | N        | N        | N        | N        | Y        | N         | U         | Y         | Y         | Y         | N         |
| Ratner, <sup>54</sup> 2000                                                                                  | Y        | Y        | Y        | Y        | N        | N        | N        | N        | N        | N         | Y         | Y         | N         | N         | N         |
| (CR: Hershon, <sup>66</sup> 2004)                                                                           |          |          |          |          |          |          |          |          |          |           |           |           |           |           |           |

**Items:**

1. Were harms pre-defined?
2. Were serious events defined?
3. Were severe events defined?
4. Were the numbers of deaths in each study specified?
5. Was the mode of harm collection specified as active?
6. Was the mode of harms collected as passive?
7. Did the study specify who collected the harms?
8. Did the study specify training of background of who ascertained the harms?
9. Did the study specify the timing and frequency of collection of harms?
10. Did the authors use standard scales or checklists for harms?
11. Did the authors specify if the harms reported encompass all the events collected or a selected sample?
12. Was the number of participants that withdrew or were lost to follow up specified for each study group?
13. Was the total number of participants affected by harms specified for each study arm?
14. Did the author(s) specify the number for each type of harmful event for each study group?
15. Did the author(s) specify the type of analyses undertaken for harms data?

N – no. U – unclear. Y - yes.

<sup>a</sup>Unpublished data.

---

## Appendix 4 | Aggregate of appraisal of reporting of adverse drug reactions, according to McHarm tool<sup>15</sup>

---

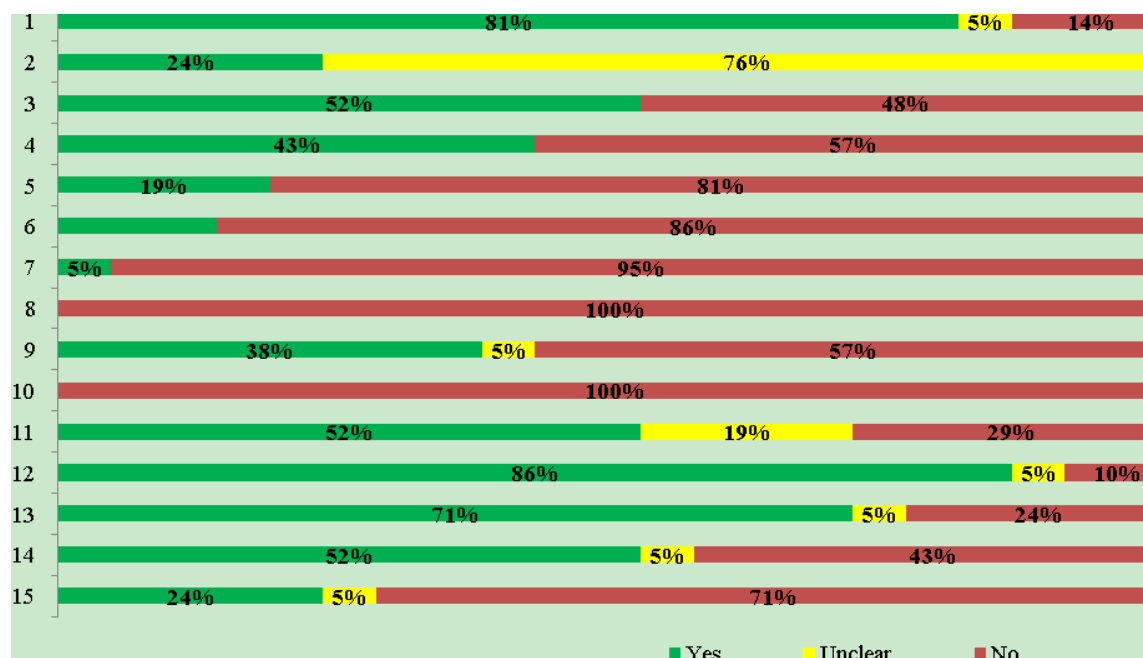


---

### Items:

1. Were harms pre-defined?
  2. Were serious events defined?
  3. Were severe events defined?
  4. Were the numbers of deaths in each study specified?
  5. Was the mode of harm collection specified as active?
  6. Was the mode of harms collected as passive?
  7. Did the study specify who collected the harms?
  8. Did the study specify training of background of who ascertained the harms?
  9. Did the study specify the timing and frequency of collection of harms?
  10. Did the authors use standard scales or checklists for harms?
  11. Did the authors specify if the harms reported encompass all the events collected or a selected sample?
  12. Was the number of participants that withdrew or were lost to follow up specified for each study group?
  13. Was the total number of participants affected by harms specified for each study arm?
  14. Did the author(s) specify the number for each type of harmful event for each study group?
  15. Did the author(s) specify the type of analyses undertaken for harms data?
-

| <b>Appendix 5   Appraisal of the cohort study using the Newcastle Ottawa scale<sup>14</sup></b> |                         |                                           |                  |          |                                     |                                     |                 |
|-------------------------------------------------------------------------------------------------|-------------------------|-------------------------------------------|------------------|----------|-------------------------------------|-------------------------------------|-----------------|
| <b>Study</b>                                                                                    | <b>1</b>                | <b>2</b>                                  | <b>3</b>         | <b>4</b> | <b>5</b>                            | <b>6</b>                            | <b>7</b>        |
| Currie, <sup>56</sup><br>2007                                                                   | Truly<br>representative | Same<br>community as<br>exposed<br>cohort | Secure<br>record | Yes      | No<br>confounders<br>controlled for | Record<br>linkage/<br>questionnaire | No<br>statement |

**Items:**

1. Representativeness of the exposed cohort
2. Selection of the non exposed cohort
3. Ascertainment of exposure
4. Demonstration that outcome of interest was not present at start of study
5. Comparability of cohorts on the basis of the design or analysis
6. Assessment of outcome
7. Adequacy of follow up of cohorts

| <b>Appendix 6   Appraisal of cost-effectiveness studies using the Drummond tool<sup>12</sup></b> |          |          |          |          |          |          |          |          |          |           |
|--------------------------------------------------------------------------------------------------|----------|----------|----------|----------|----------|----------|----------|----------|----------|-----------|
| <b>Study</b>                                                                                     | <b>1</b> | <b>2</b> | <b>3</b> | <b>4</b> | <b>5</b> | <b>6</b> | <b>7</b> | <b>8</b> | <b>9</b> | <b>10</b> |
| Pfohl, <sup>57</sup> 2012                                                                        | Y        | Y        | N        | Y        | Y        | Y        | Y        | Y        | Y        | Y         |
| Valentine, <sup>58</sup>                                                                         | Y        | Y        | N        | Y        | Y        | Y        | NA       | Y        | Y        | Y         |
| Valentine, <sup>59</sup> 2011                                                                    | Y        | Y        | Y        | Y        | C        | Y        | Y        | Y        | Y        | Y         |
| Cameron, <sup>7</sup> 2009                                                                       | Y        | Y        | Y        | Y        | Y        | Y        | Y        | Y        | Y        | Y         |
| Greiner, <sup>60</sup> 2009 <sup>a</sup>                                                         | Y        | Y        | C        | C        | C        | C        | Y        | Y        | C        | C         |
| Gschwend, <sup>61</sup> 2009                                                                     | Y        | Y        | Y        | Y        | Y        | Y        | Y        | Y        | Y        | Y         |
| Tunis, <sup>62</sup> 2009                                                                        | Y        | Y        | Y        | Y        | C        | Y        | Y        | Y        | Y        | Y         |
| Grima, <sup>63</sup> 2007                                                                        | Y        | Y        | Y        | Y        | Y        | Y        | Y        | Y        | Y        | Y         |
| McEwan, <sup>64</sup> 2007                                                                       | Y        | Y        | Y        | Y        | Y        | Y        | Y        | Y        | Y        | C         |
| Valentine, <sup>65</sup> 2006                                                                    | Y        | Y        | Y        | Y        | C        | Y        | C        | Y        | Y        | Y         |

**Items:**

1. Was a well-defined question posed in answerable form?
2. Was a comprehensive description of the competing alternatives given?
3. Was the effectiveness of the programme or services established?
4. Were all the important and relevant costs and consequences for each alternative identified?
5. Were costs and consequences measured accurately in appropriate physical units?
6. Were costs and consequences valued credibly?
7. Were costs and consequences adjusted for differential timing?
8. Was an incremental analysis of costs and consequences of alternatives performed?
9. Was allowance made for uncertainty in the estimates of costs and consequences?
10. Did the presentation and discussion of study results include all issues of concern to users?

C - can't tell. NA - not applicable. N – no. Y - yes.

<sup>a</sup>Unpublished data.

| <b>Appendix 7   Patient characteristics</b> |                 |                                     |                              |                              |                                                  |
|---------------------------------------------|-----------------|-------------------------------------|------------------------------|------------------------------|--------------------------------------------------|
| <b>Study</b>                                | <b>% female</b> | <b>Mean age, years (SD) [range]</b> | <b>Mean BMI (SD) [range]</b> | <b>Mean A1C (SD) [range]</b> | <b>Mean duration of T1DM, years (SD) [range]</b> |
| <b><i>RANDOMIZED CLINICAL TRIALS</i></b>    |                 |                                     |                              |                              |                                                  |
| Mathiesen, <sup>32</sup> 2012               | 100.0           | 30.1 (8.0)                          | 24.8 (4.1)                   | 7.0 (4.4)                    | 12.3 (8.0)                                       |
| Renard, <sup>33</sup> 2011                  | 39.1            | 47.4 (9.2)                          | 25.0 (3.5)                   | 7.1 (0.7)                    | 17.8 (9.2)                                       |
| Zachariah, <sup>34</sup> 2011               | 39.1            | 38.8 (2.1)                          | 28.0 (3.6)                   | 8.2 (0.2)                    | 20.0 (2.1)                                       |
| Heller, <sup>35</sup> 2009                  | 44.0            | 42.0 (11.4)                         | 26.5 (4.0)                   | 8.1 (1.1)                    | 17.2 (11.4)                                      |
| Le Floch, <sup>36</sup> 2009                | 47.5            | 41.5 (10.0)                         | 25.0 (4.0)                   | 8.5 (0.9)                    | 16.5 (10.0)                                      |
| Bartley, <sup>37</sup> 2008                 | 45.3            | 35.0 [18.0-75.0]                    | 24.7 [15.4-34.7]             | 8.3 [5.0-11.6]               | 13.0 [1.0-50.4]                                  |
| Bolli, <sup>38</sup> 2008                   | 44.6            | 36.3 (9.0)                          | 23.5 (2.0)                   | 7.9 (0.7)                    | 13.9 (9.0)                                       |
| Chatterjee, <sup>39</sup> 2007              | 41.7            | 42.9 (11.8)                         | 27.0 (4.2)                   | 8.5 (1.2)                    | 18.2 (11.8)                                      |
| Pesic, <sup>40</sup> 2007                   | 45.8            | 28.3 (2.1)                          | 23.1 (10.5)                  | NR                           | 13.1 (2.1)                                       |
| Philippo, <sup>41</sup> 2007 <sup>a</sup>   | 43.1            | 40.3 (NR)                           | NR                           | 8.5 (0.9)                    | NA                                               |
| Pieber, <sup>42</sup> 2007                  | 48.8            | 40.5 [18.0-79.0]                    | 25.6 [16.8-35.1]             | 8.9 [7.6-11.9]               | 16.5 [1.0-57.0]                                  |
| Radman, <sup>43</sup> 2007                  | 42.9            | 36.7 (8.2)                          | 24.4 (2.7)                   | 8.3 (1.4)                    | 12.1 (8.2)                                       |
| Ashwell, <sup>44</sup> 2006                 | 40.0            | 43.4 (12.1)                         | 26.7 (4.5)                   | 8.0 (0.9)                    | 26.9 (12.1)                                      |
| Kolendorf, <sup>45</sup> 2006               | 46.2            | 39.2 (10.2)                         | 25.3 (3.5)                   | 7.9 (0.7)                    | 16.6 (10.2)                                      |
| De Leeuw, <sup>46</sup> 2005                | 59.0            | 40.3 (9.9)                          | 24.5 (3.1)                   | 8.1 (1.1)                    | 14.4 (9.9)                                       |
| Fulcher, <sup>47</sup> 2005                 | 61.0            | 40.5 (10.1)                         | 26.6 (3.8)                   | 9.5 (1.2)                    | 17.5 (10.1)                                      |
| Peiber, <sup>48</sup> 2005                  | 21.0            | 40.1 (10.1)                         | 25.2 (3.4)                   | 8.1 (1.3)                    | 14.6 (10.1)                                      |
| Home, <sup>49</sup> 2004                    | 46.1            | 40.2 (10.6)                         | 25.2 (2.4)                   | 8.6 (1.2)                    | 16.6 (10.6)                                      |
| Porcellati, <sup>50</sup> 2004              | 44.6            | 35.0 (0.3)                          | 23.1 (0.1)                   | 7.2 (0.2)                    | 14.0 (0.3)                                       |
| Russell-Jones, <sup>51</sup> 2004           | 35.9            | 40.5 (10.7)                         | 25.2 (3.4)                   | 8.4 (1.2)                    | 16.9 (10.7)                                      |
| Standl, <sup>52</sup> 2004                  | 36.0            | 41.6 (9.8)                          | 25.7 (3.2)                   | 7.7 (1.2)                    | 16.1 (9.8)                                       |
| Rossetti, <sup>53</sup> 2003                | 47.0            | 32.4 (2.2)                          | 23.1 (0.9)                   | 6.9 (0.2)                    | 13.6 (2.2)                                       |
| Vague, <sup>54</sup> 2003                   | 47.2            | 40.4 (10.3)                         | 24.6 (3.3)                   | 8.2 (1.1)                    | 17.2 (10.3)                                      |
| Pieber, <sup>55</sup> 2000                  | 39.1            | 36.3 [18.0-70.0]                    | 24.0 [18.6-30.3]             | 8.0 (0.1)                    | 11.0 [1.0-48.0]                                  |
| Raskin, <sup>56</sup> 2000                  | 48.5            | 39.2 (11.7)                         | 25.6 (3.7)                   | NR                           | 18.6 (11.7)                                      |
| Ratner, <sup>57</sup> 2000                  | 49.4            | 38.5 (10.9)                         | 25.8 (4.3)                   | 7.7 (1.2)                    | 17.4 (10.9)                                      |



|                                             |      |             |            |           |             |
|---------------------------------------------|------|-------------|------------|-----------|-------------|
| Rosenstock, <sup>58</sup><br>2000           | 48.1 | 37.5 (10.7) | 24.3 (2.6) | 7.9 (1.1) | 16.3 (10.7) |
| <b><u>COHORT STUDY</u></b>                  |      |             |            |           |             |
| Currie, <sup>59</sup> 2007                  | 46.6 | 37.8 (NR)   | 25.6 (NR)  | NR        | NR          |
| <b><u>COST-EFFECTIVENESS STUDIES</u></b>    |      |             |            |           |             |
| Pfohl, <sup>60</sup> 2012                   | 47.4 | 34.9 (10.0) | NR         | 8.8 (2.3) | 13.4 (NR)   |
| Valentine, <sup>61</sup><br>2012            | NR   | NR          | NR         | NR        | NR          |
| Valentine, <sup>62</sup><br>2011            | 45.3 | 35.0 (12.0) | 24.7 (3.7) | 8.3 (1.2) | 13.0 (NR)   |
| Cameron, <sup>7</sup><br>2009               | NR   | NR          | NR         | NR        | NR          |
| Greiner, <sup>63</sup><br>2009 <sup>a</sup> | NR   | NR          | NR         | NR        | NR          |
| Gschwend, <sup>64</sup><br>2009             | 45.3 | 35.0 (12.0) | 24.7 (3.7) | 8.3 (1.2) | 13.0 (NR)   |
| Tunis, <sup>65</sup> 2009                   | 46.0 | 27.0 (NR)   | 23.8 (NR)  | 8.9 (NR)  | 9.0 (NR)    |
| Grima, <sup>66</sup> 2007                   | NR   | 27.0 (NR)   | NR         | 8.5 (NR)  | NR          |
| McEwan, <sup>67</sup><br>2007               | 46.0 | 27.0 (NR)   | NR         | 8.8 (NR)  | NR          |
| Valentine, <sup>68</sup><br>2006            | 48.7 | 40.2 (NR)   | 25.2 (NR)  | 8.38(NR)  | 16.3 (NR)   |

A1C - glycosylated hemoglobin (%). BMI - body mass index (kg/m<sup>2</sup>). NR - not reported; SD - standard deviation. T1DM - type 1 diabetes mellitus.

<sup>a</sup>Unpublished data.

---

**Appendix 8 | Network geometry for glycosylated hemoglobin\***

---

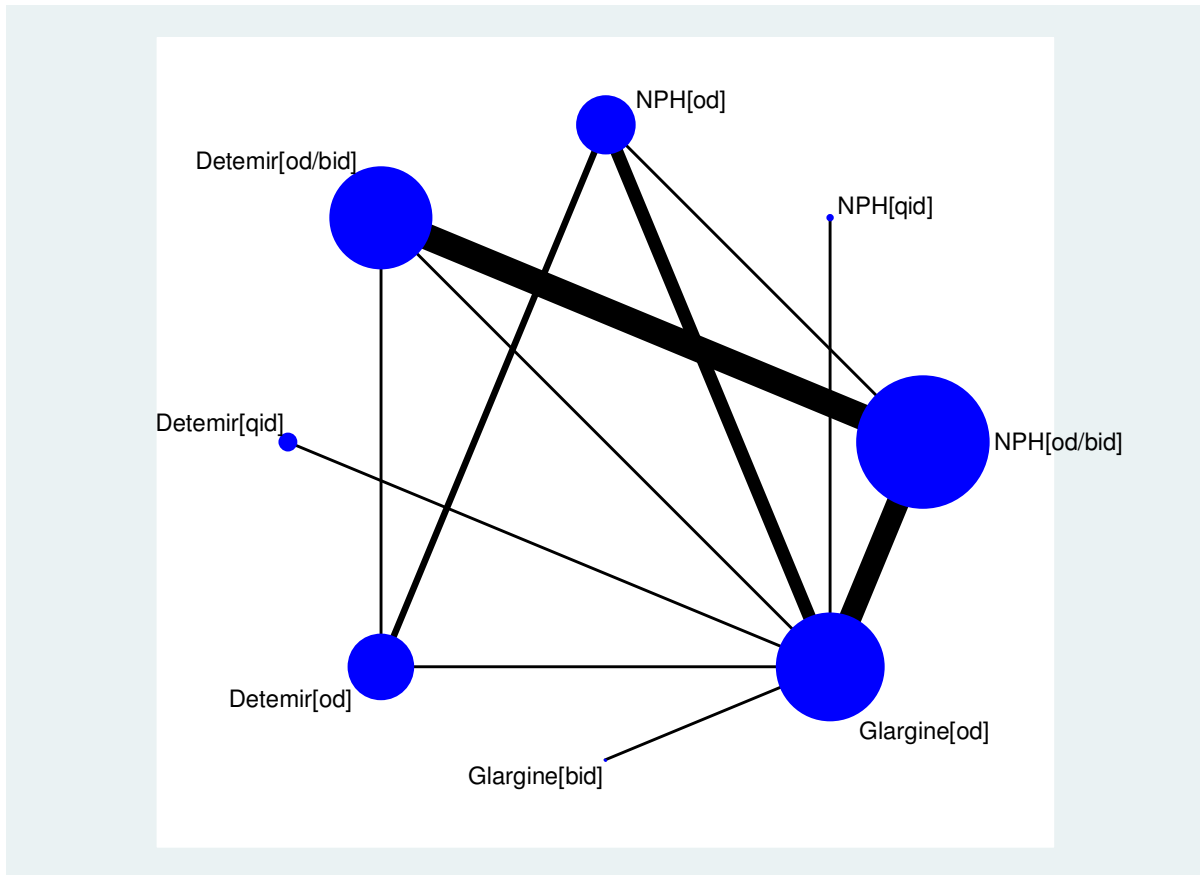

---

\* 26 randomized clinical trials including 6,776 patients contributing to network meta-analysis for glycosylated hemoglobin. Size of the node and line indicates the number of studies included in each comparison.

Abbreviations: bid - twice daily; od - once daily; qid - four times daily.

---

**Appendix 9 | Risk of Bias (RoB) for glycosylated hemoglobin\***

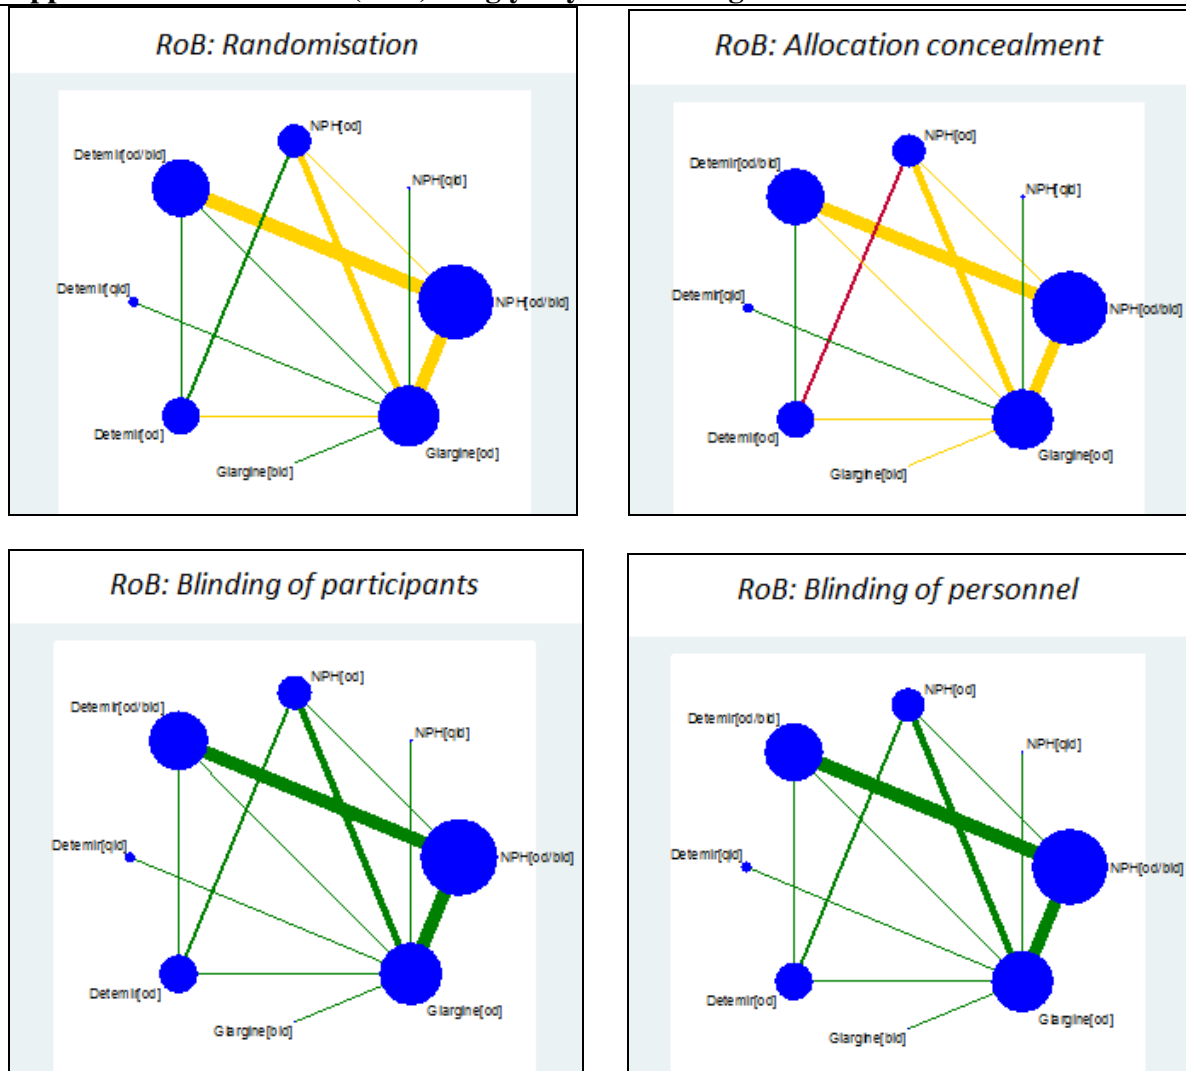

\* 26 randomized clinical trials including 6,776 patients contributing to network meta-analysis for glycosylated hemoglobin. Size of the node and line indicates the number of studies included in each comparison.

Abbreviations: bid - twice daily; od - once daily; qid - four times daily.

Note: Comparison-specific bias level estimated as the node of study-specific levels. Green= low bias level; yellow= unclear bias level; red = high bias level.

**Appendix 10 | Sub-group analysis for glycosylated hemoglobin**

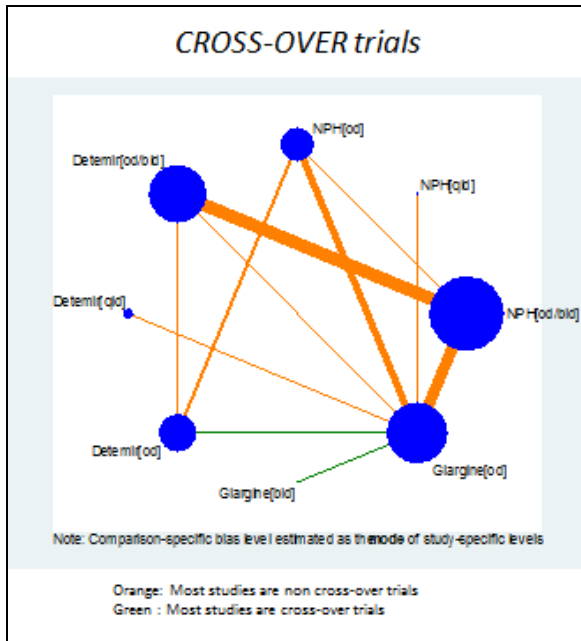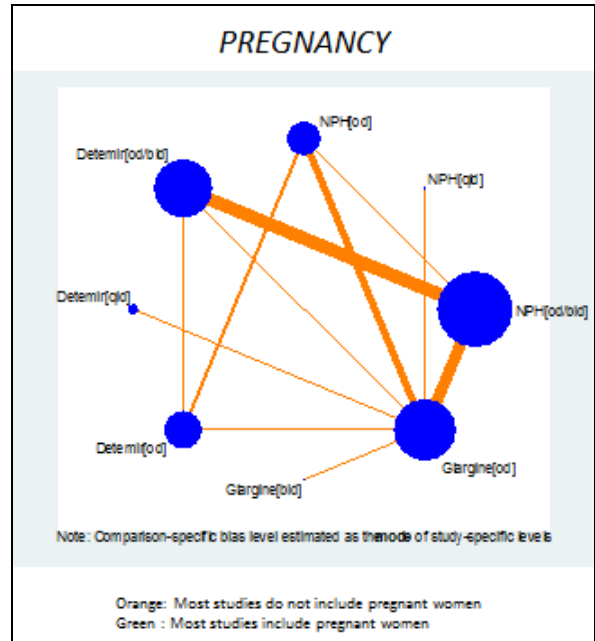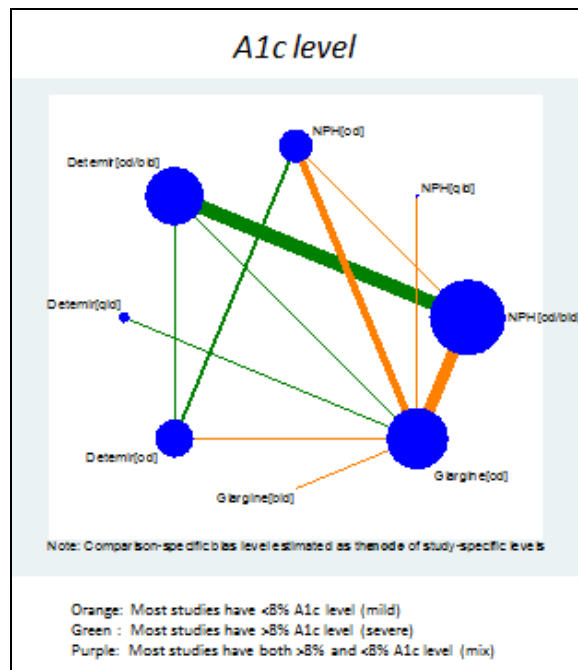

Size of the node and line indicates the number of studies included in each comparison.

\*\* Bid - twice daily; Od - once daily; Qid - four times daily.

Note: Comparison-specific bias level estimated as the mode of study-specific levels.

**Appendix 11 | Random effects pairwise meta-analysis for glycosylated hemoglobin\***

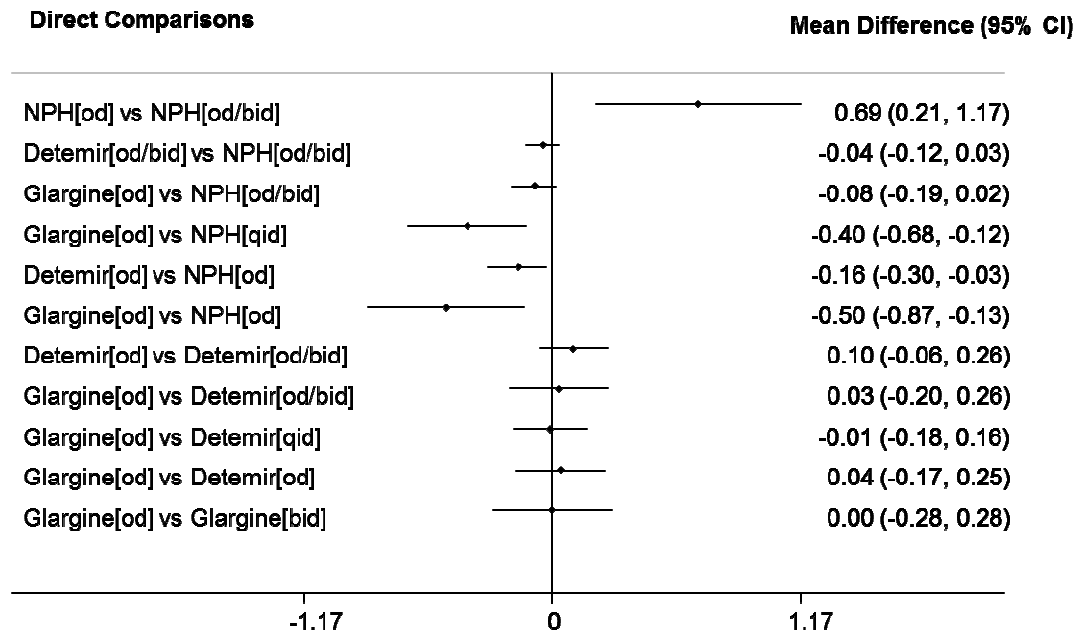

\* 26 randomized clinical trials including 6,776 patients contributing to random effects pairwise meta-analysis, assuming that each comparison has a different amount of heterogeneity, for glycosylated hemoglobin. The heterogeneity has been estimated using the restricted Maximum Likelihood method.

\*\* Bid - twice daily; Od - once daily; Qid - four times daily.

---

Appendix 12 | Comparison adjusted funnel plot for glycosylated hemoglobin\*

---

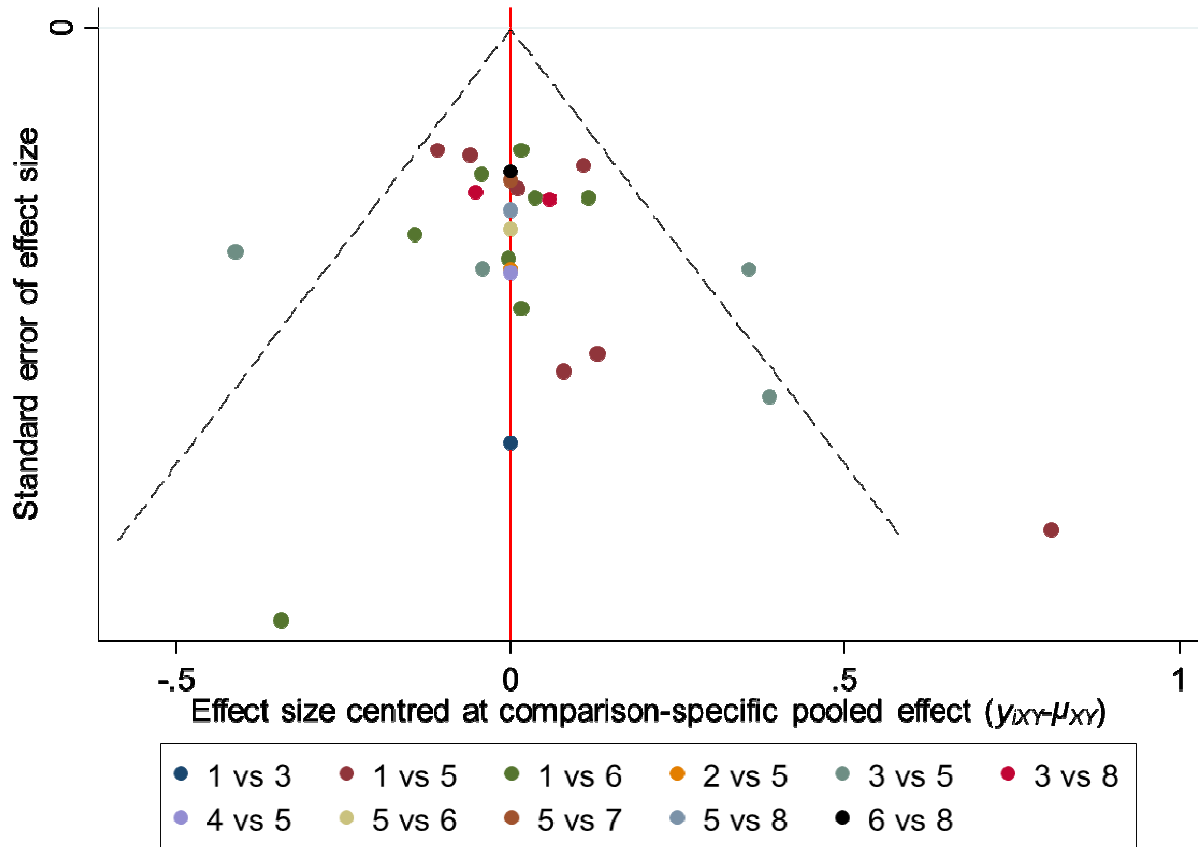

---

\* 26 randomized clinical trials including 6,776 patients contributing to the funnel plot.

---

---

Appendix 13 | Comparison adjusted funnel plot for glycosylated hemoglobin\*

---

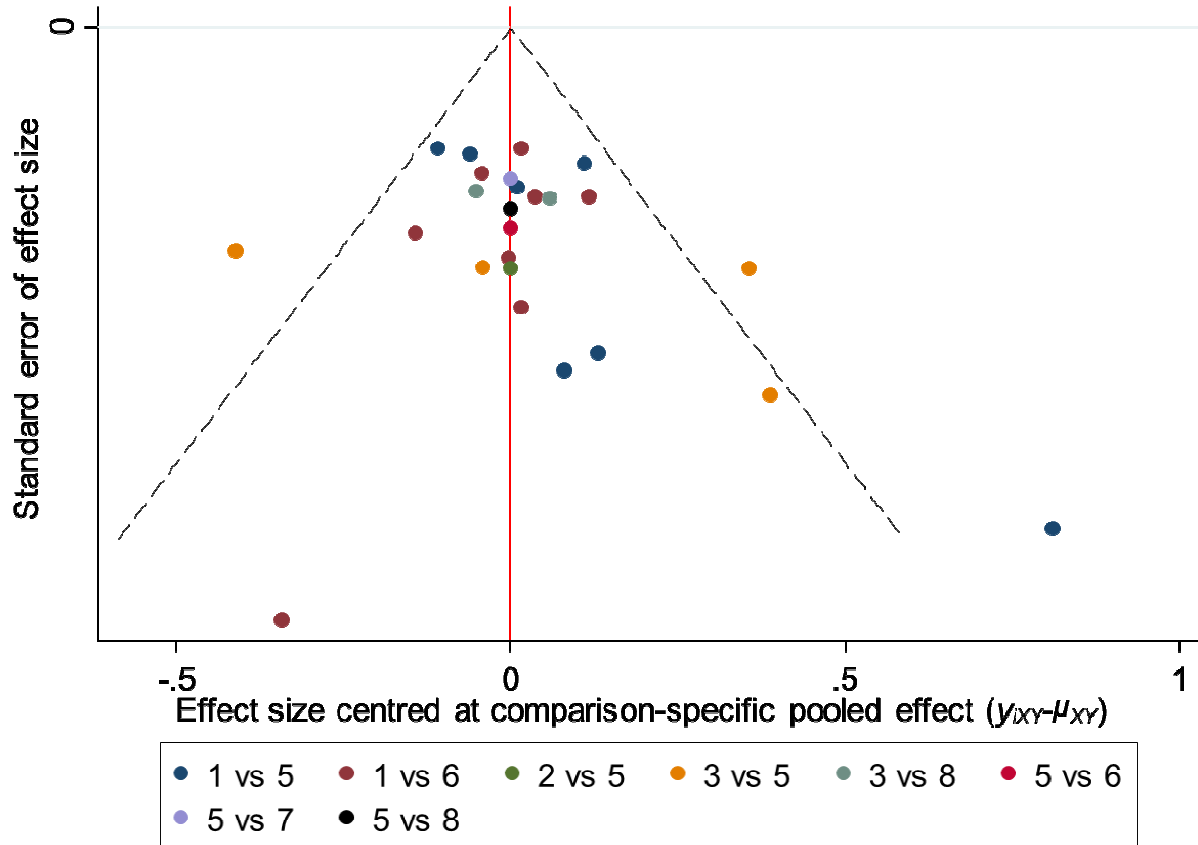

---

\* 26 randomized clinical trials including 6,776 patients contributing to the funnel plot. Restricting only to general comparisons: NPH vs. Glargine; NPH vs. Detemir; Detemir vs. Glargine

---

**Appendix 14 | Loop-Specific Method for glycosylated hemoglobin\***

| Closed Loop                                     | Inconsistency Factor (MD) | 95%CI (truncated) | Loop-specific Heterogeneity |
|-------------------------------------------------|---------------------------|-------------------|-----------------------------|
| NPH[od/bid]-NPH[od]-Detemir[od/bid]-Detemir[od] | 0.47                      | (0.00,1.00)       | 0.000                       |
| NPH[od]-Detemir[od]-Glargine[od]                | 0.37                      | (0.00,1.18)       | 0.083                       |
| NPH[od/bid]-NPH[od]-Glargine[od]                | 0.34                      | (0.00,1.18)       | 0.083                       |
| Detemir[od/bid]-0Detemir[od]-Glargine[od]       | 0.11                      | (0.00,0.46)       | 0.000                       |
| NPH[od/bid]-Detemir[od/bid]-Glargine[od]        | 0.05                      | (0.00,0.35)       | 0.001                       |

\* 26 randomized clinical trials including 6,776 patients contributing to the loop-specific method.

\*\* Bid - twice daily; Od - once daily; Qid - four times daily.



**Appendix 15 | Treatment Ranking: Probabilities of being the best for glycosylated hemoglobin\***

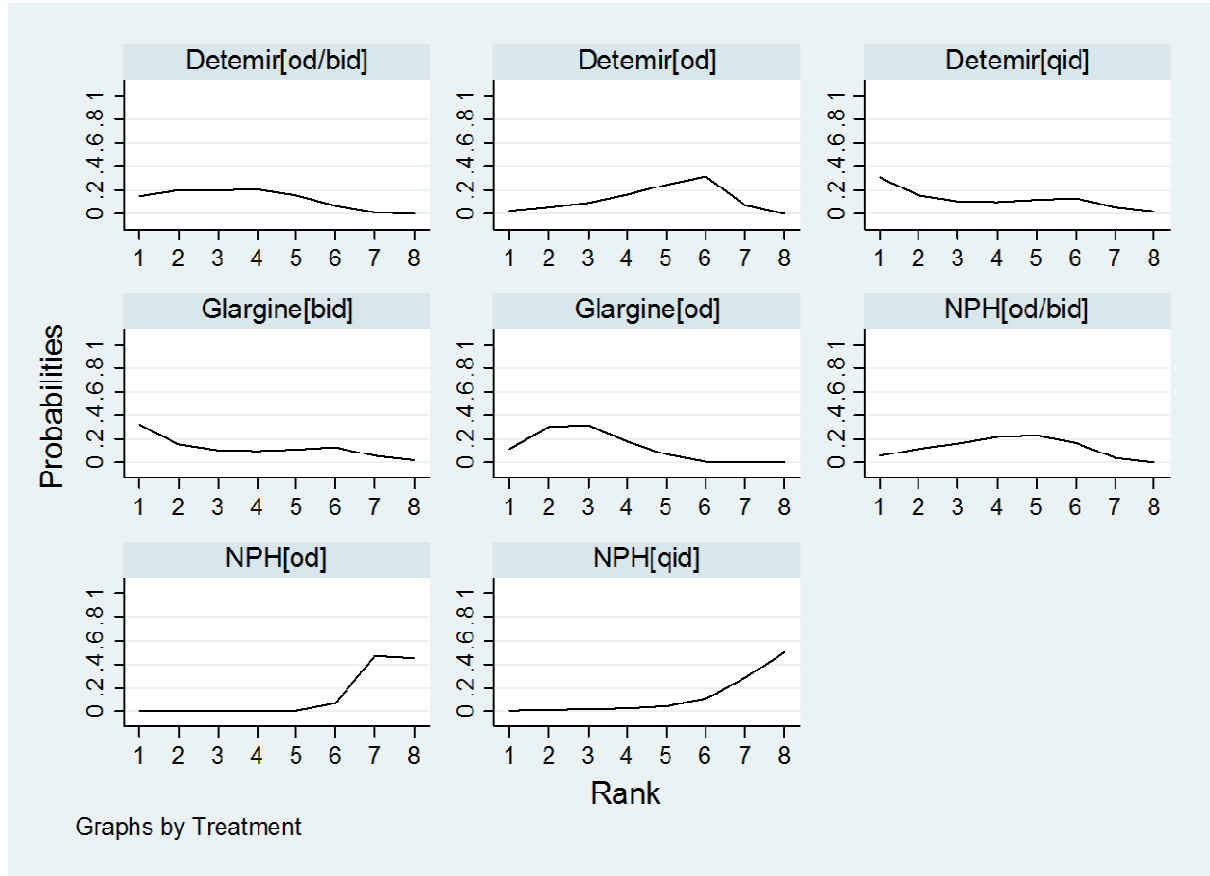

\*26 randomized clinical trials including 6,776 patients contributing to the treatment ranking analysis showing the probabilities of being the best for glycosylated hemoglobin.

\*\*Bid - twice daily. Od - once daily. SUCRA - surface under the cumulative ranking curve. Qid - four times daily.

**Appendix 16 | Surface under the cumulative ranking curve for glycosylated hemoglobin\***

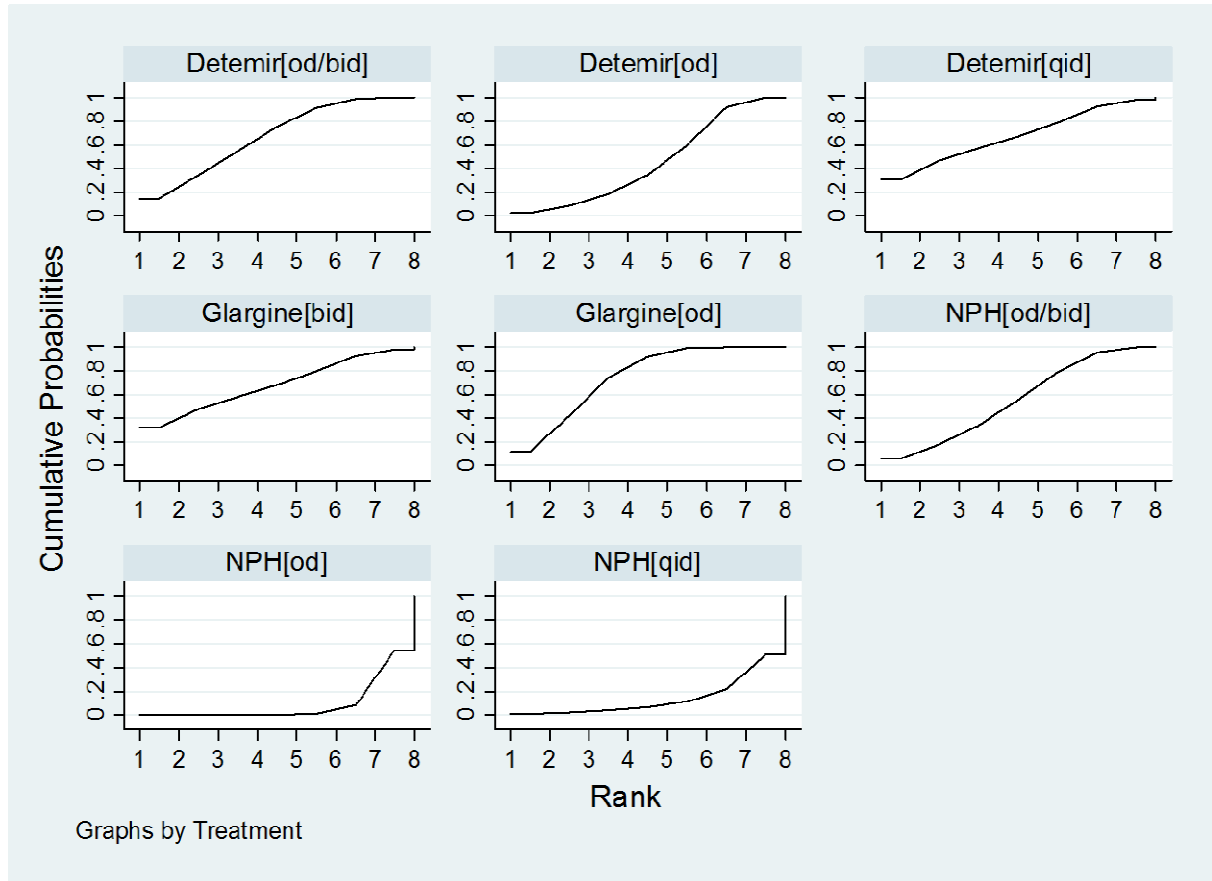

\*26 randomized clinical trials including 6,776 patients contributing to the treatment ranking analysis using SUCRA approach.

\*\*Bid - twice daily. Od - once daily. SUCRA - surface under the cumulative ranking curve. Qid - four times daily. The SUCRA allows identifying which treatment is the most effective overall and can be interpreted as 1 = treatment is certain to be the best and 0 = treatment is certain to be the worst.

---

**Appendix 17 | Network geometry for body weight\***

---

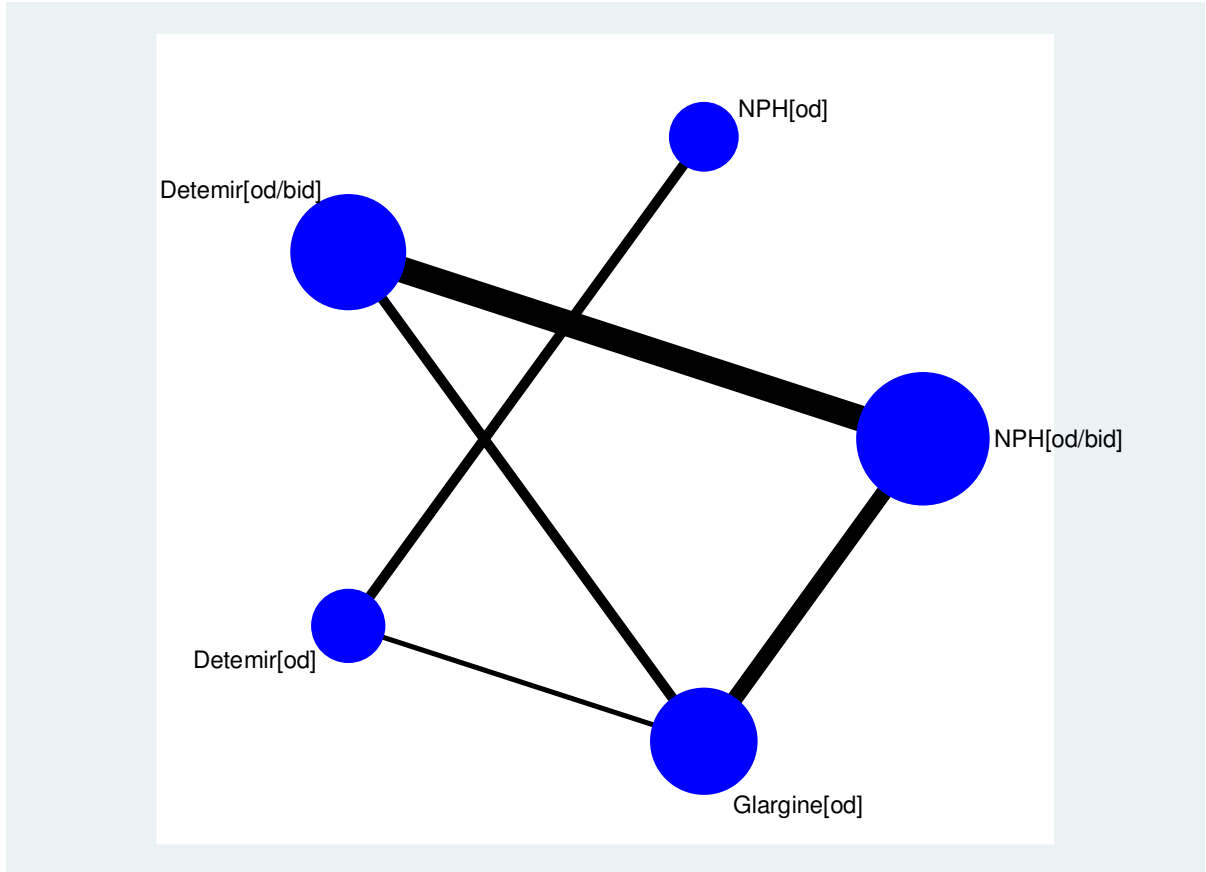

---

\*13 randomized clinical trials including 3,396 patients contributing to network meta-analysis. Size of the node and line indicates the number of studies included in each comparison.

\*\* Bid - twice daily; Od - once daily; Qid - four times daily.

---

**Appendix 18 | Risk of Bias (RoB) for body weight\***

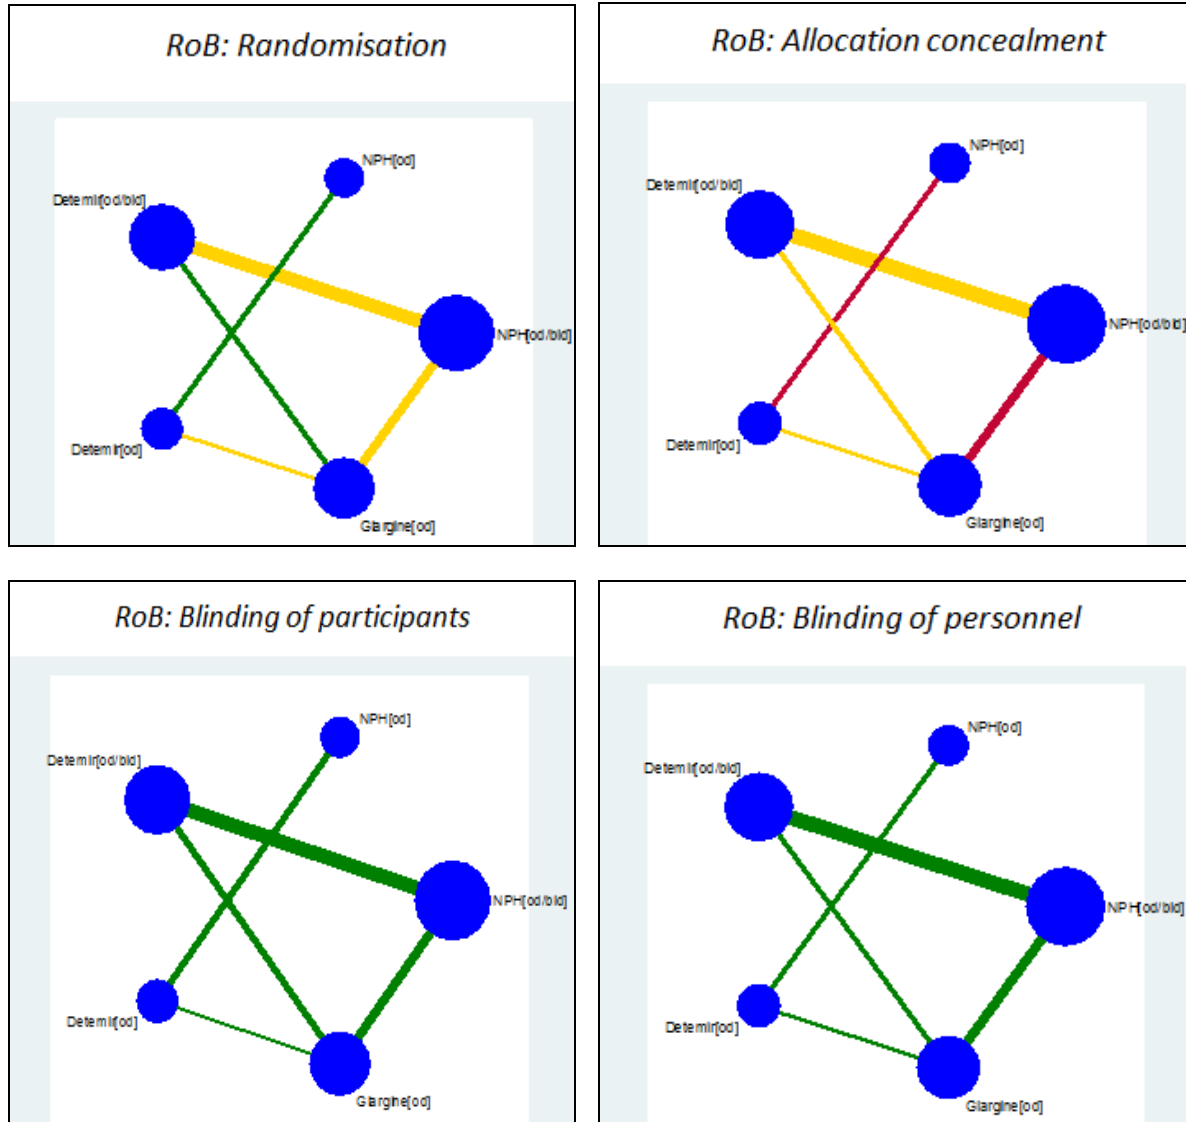

\*13 randomized clinical trials including 3,396 patients contributing to network meta-analysis. Size of the node and line indicates the number of studies included in each comparison.

\*\* Bid - twice daily; Od - once daily; Qid - four times daily.

Note: Comparison-specific bias level estimated as the node of study-specific levels. Green= low bias level; yellow= unclear bias level; red = high bias level.

**Appendix 19 | Sub-group analysis for body weight**

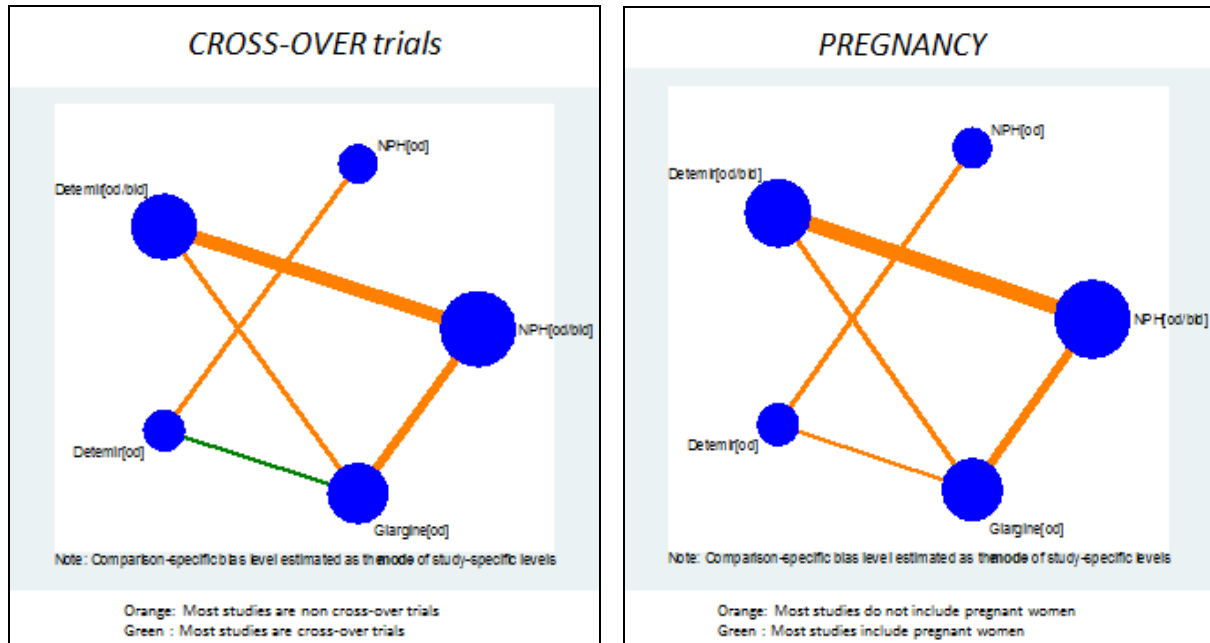

Size of the node and line indicates the number of studies included in each comparison.

\*\* Bid - twice daily; Od - once daily; Qid - four times daily.

Note: Comparison-specific bias level estimated as the node of study-specific levels.

---

**Appendix 20 | Random Effects Pairwise Meta-analysis for body weight\***

---

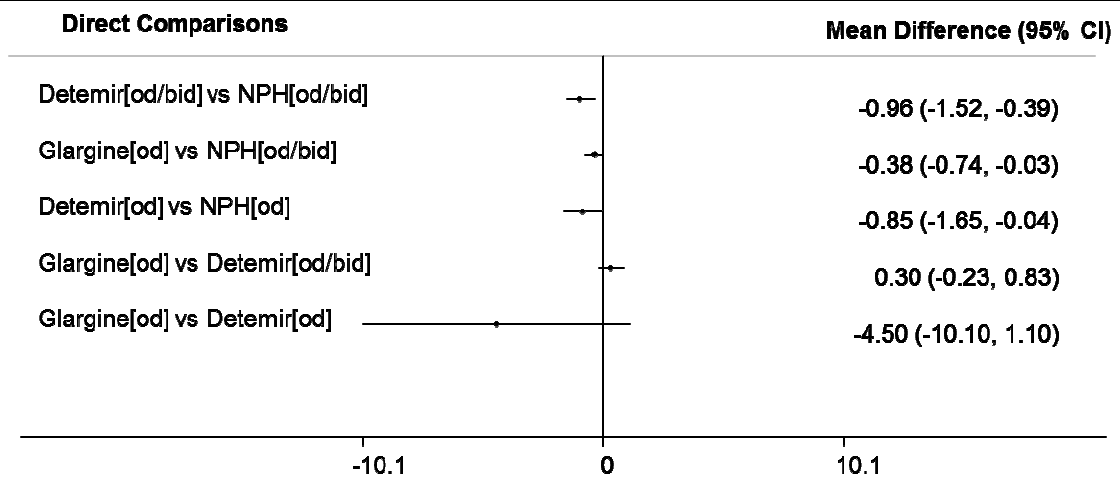


---

\*13 randomized clinical trials including 3,396 patients contributing to the random effects pairwise meta-analysis, assuming that each comparison has a different amount of heterogeneity. The heterogeneity has been estimated using the restricted Maximum Likelihood method.

\*\* Bid - twice daily; Od - once daily; Qid - four times daily.

---

---

**Appendix 21 | Comparison adjusted funnel plot for body weight\***

---

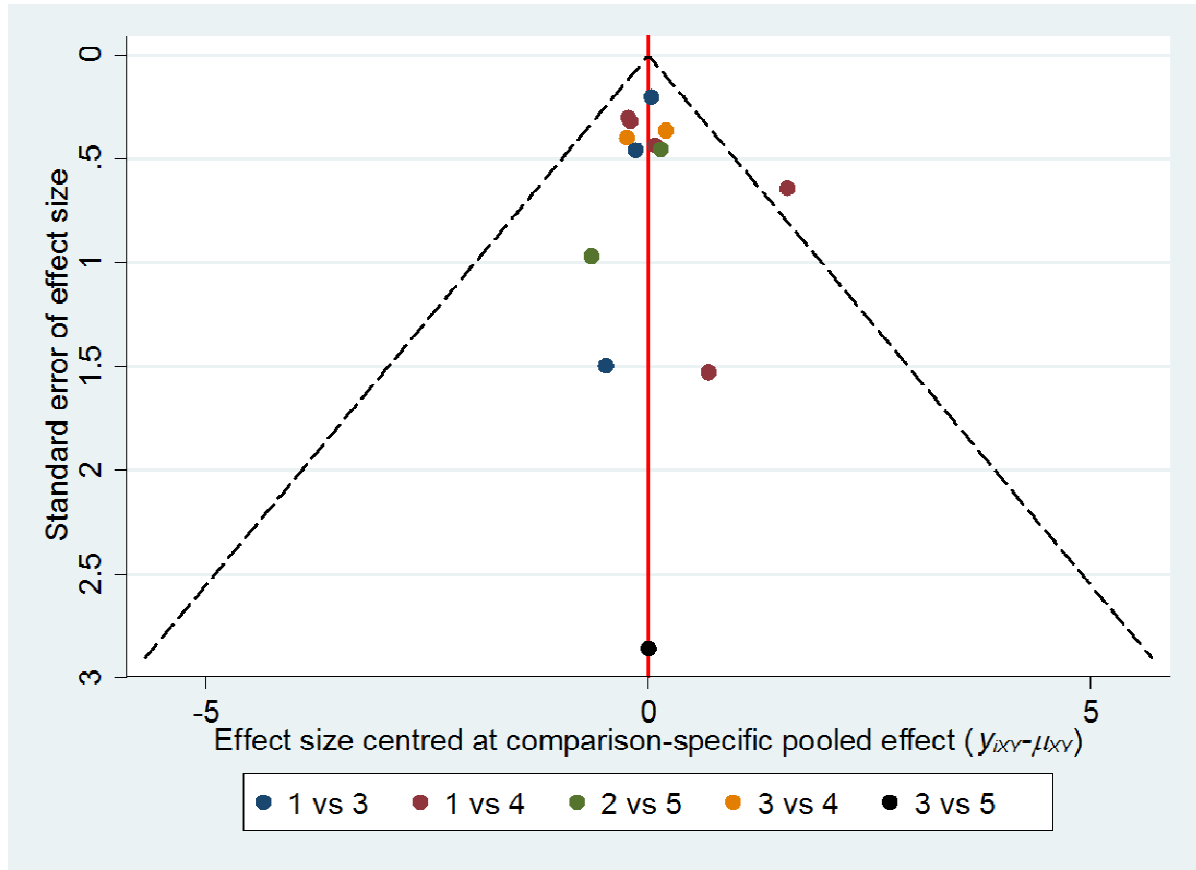

---

\*13 randomized clinical trials including 3,396 patients contributing to the comparison adjusted funnel plot for body weight.

---

**Appendix 22 | Loop-Specific method for body weight\***

| Closed Loop                              | Inconsistency Factor (MD) | 95%CI (truncated) | Loop-specific Heterogeneity |
|------------------------------------------|---------------------------|-------------------|-----------------------------|
| NPH[od/bid]-Detemir[od/bid]-Glargine[od] | 0.14                      | (0.00,0.92)       | 0.000                       |

\*13 randomized clinical trials including 3,396 patients contributing to the loop-specific method for body weight.

\*\* Bid - twice daily; Od - once daily; Qid - four times daily.



**Appendix 23 | Network Meta-analysis estimates for body weight\***

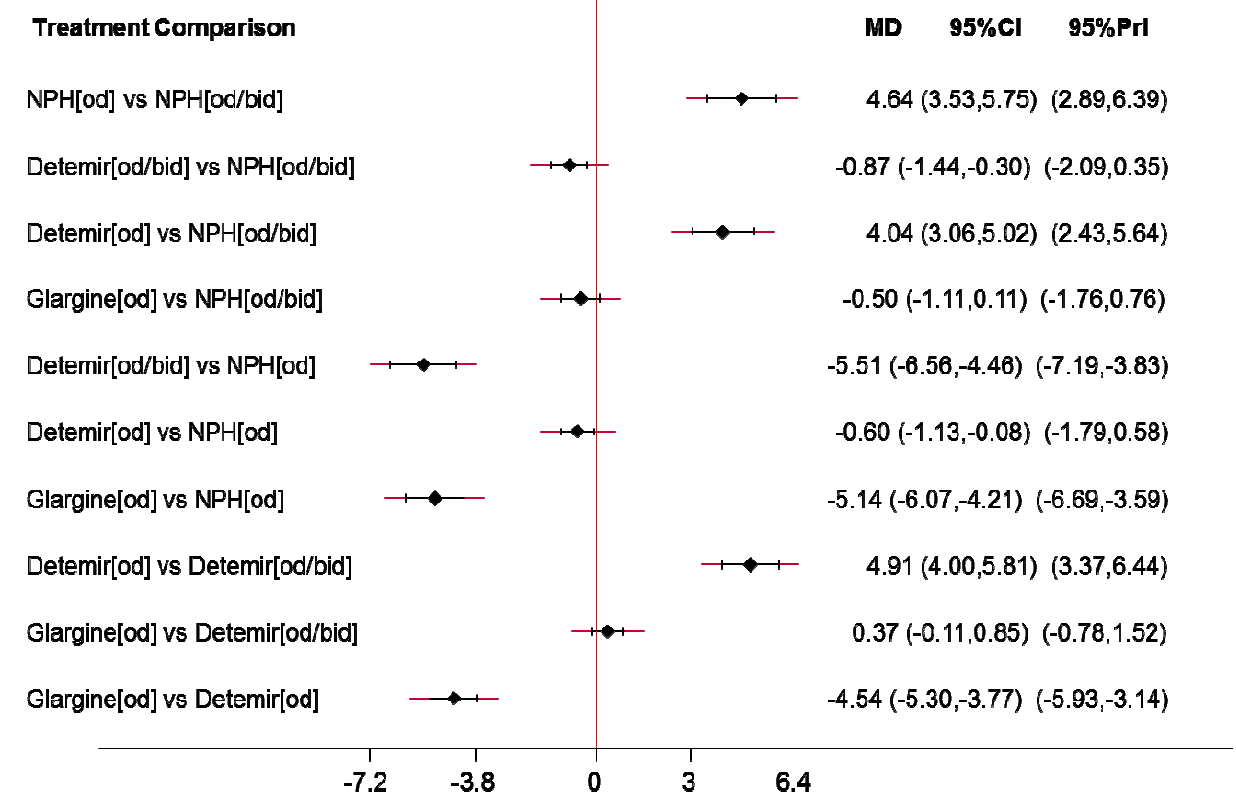

\*13 randomized clinical trials including 3,396 patients contributing to the network meta-analysis estimates.

\*\* Bid - twice daily; Od - once daily; Qid - four times daily.

---

**Appendix 24 | Treatment Ranking: Probabilities of being the best for body weight\***

---

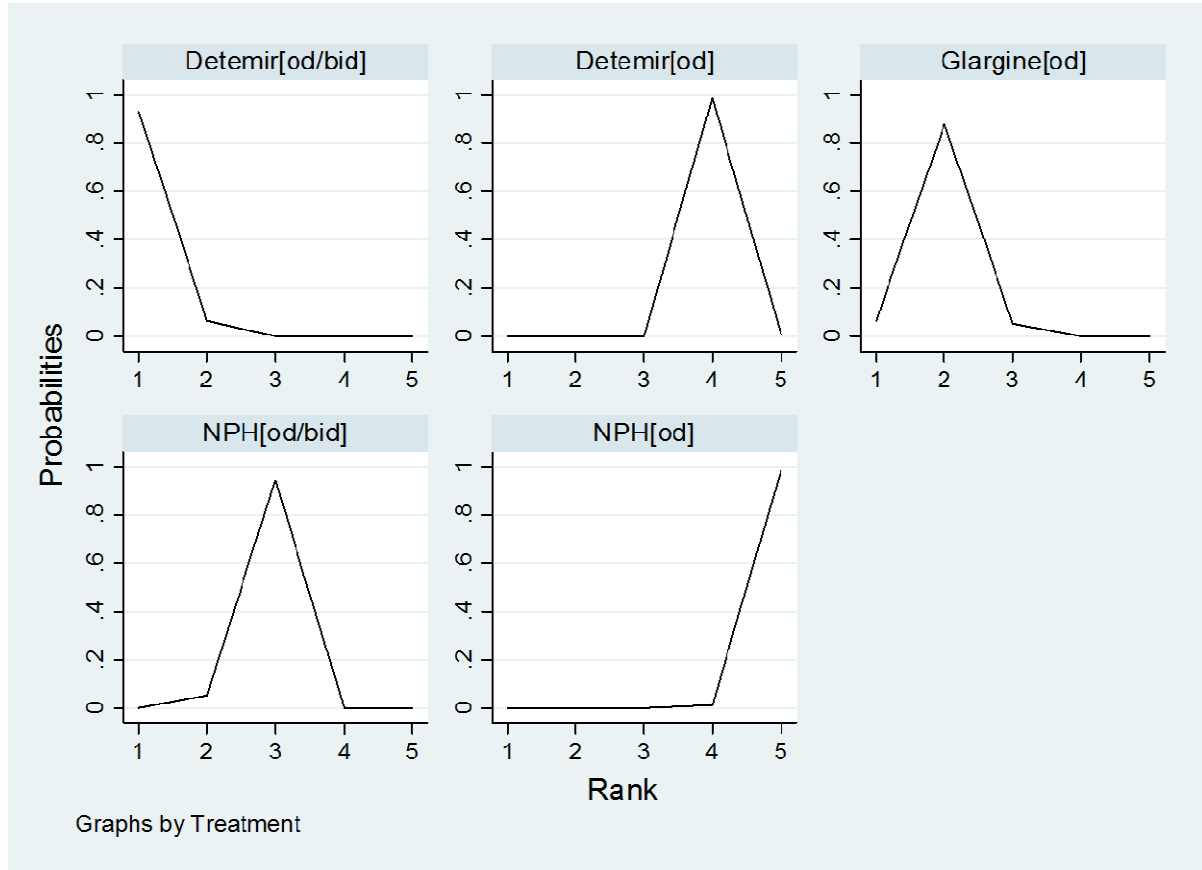

---

\*13 randomized clinical trials including 3,396 patients contributing to the treatment ranking analysis showing the probabilities of being the best.

\*\*Bid - twice daily; Od - once daily; Qid - four times daily.

---

**Appendix 25 | Surface under the cumulative ranking curve for body weight\***

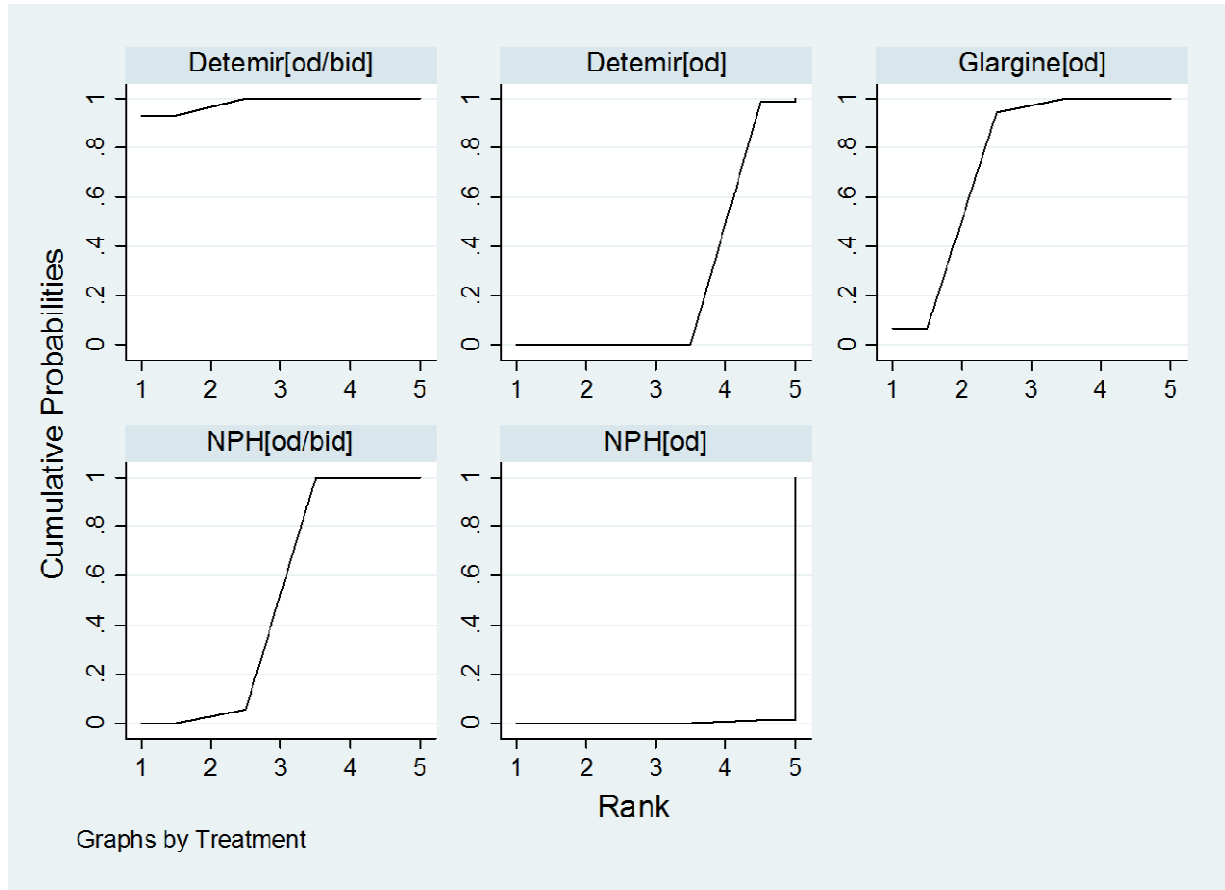

\*13 randomized clinical trials including 3,396 patients contributing to the treatment ranking analysis using SUCRA approach.

\*\*Bid - twice daily; Od - once daily; Qid - four times daily. SUCRA - surface under the cumulative ranking curve. The SUCRA allows identifying which treatment is the most effective overall and can be interpreted as 1 = treatment is certain to be the best and 0 = treatment is certain to be the worst.

---

**Appendix 26 | Network geometry for severe hypoglycemia\***

---

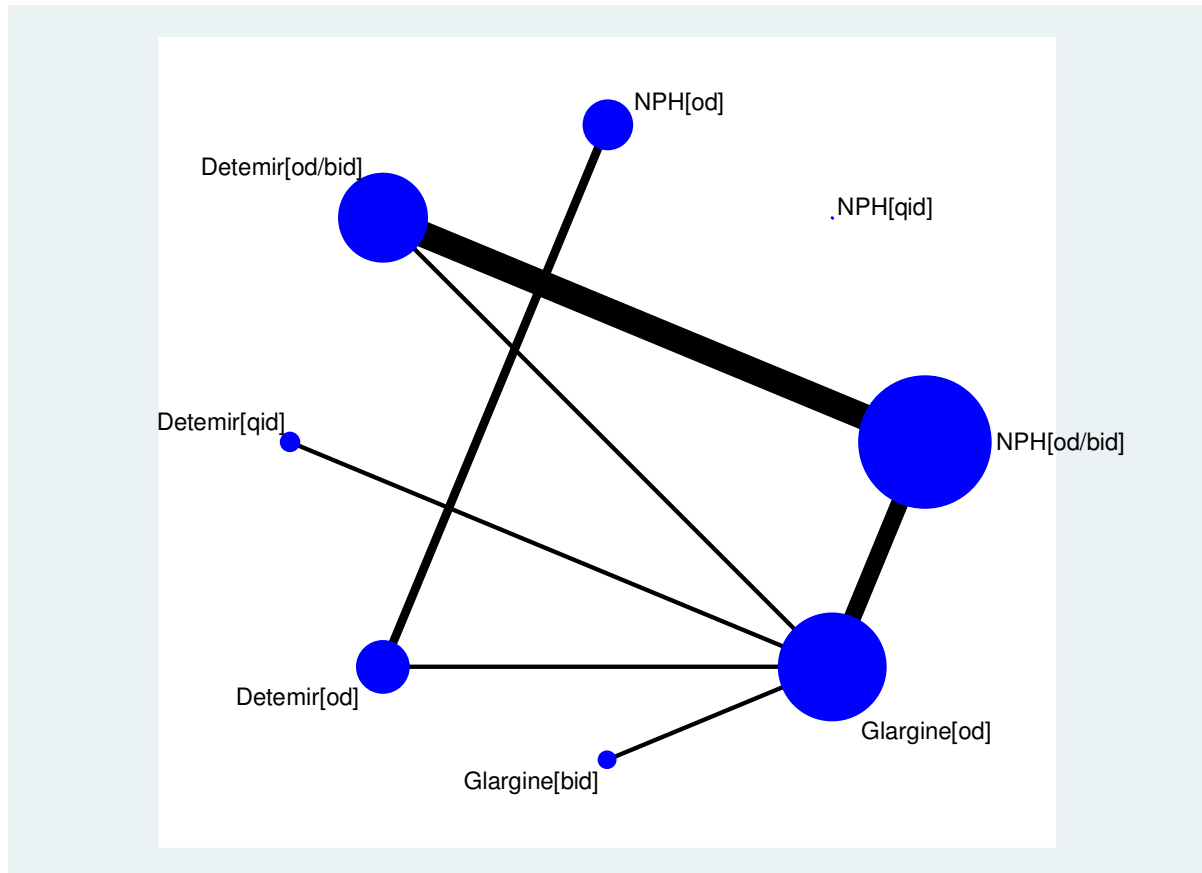

---

\*16 RCTs including 5697 patients contributing to network meta-analysis. Size of the node thickness of the line indicates the number of studies included in each comparison.

\*\* Bid - twice daily; Od - once daily; Qid - four times daily.

---

**Appendix 27 | Risk of Bias (RoB) for hypoglycemia\***

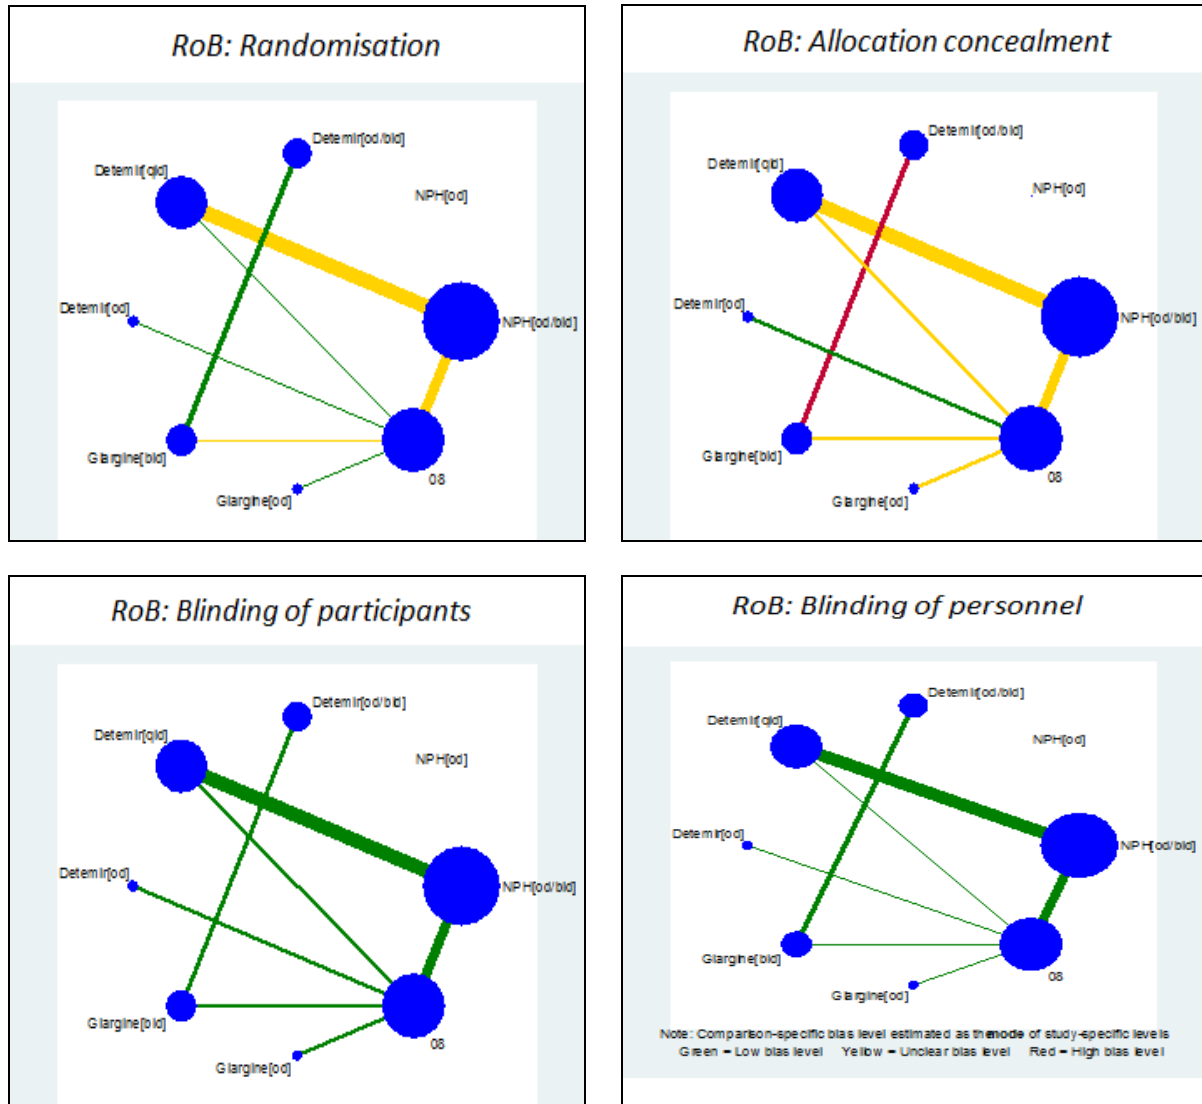

\*16 RCTs including 5697 patients contributing to network meta-analysis. Size of the node thickness of the line indicates the number of studies included in each comparison.

\*\* Bid - twice daily; Od - once daily; Qid - four times daily.

Note: Comparison-specific bias level estimated as the node of study-specific levels. Green= low bias level; yellow= unclear bias level; red = high bias level.

**Appendix 28 | Sub-group analysis for hypoglycemia**

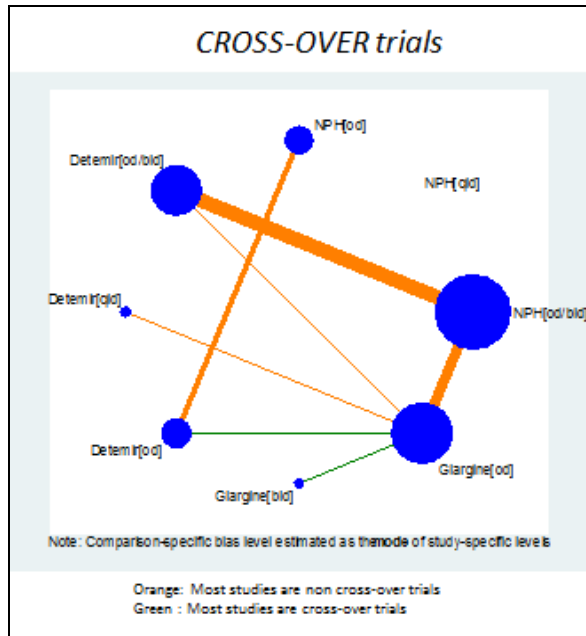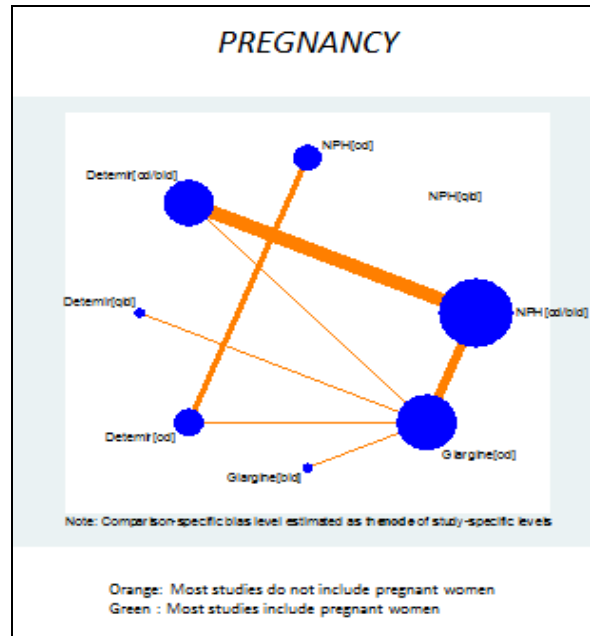

Size of the node and line indicates the number of studies included in each comparison.

\*\* Bid - twice daily; Od - once daily; Qid - four times daily.

Note: Comparison-specific bias level estimated as the mode of study-specific levels.

---

**Appendix 29 | Random Effects Pairwise Meta-analysis for severe hypoglycemia\***

---

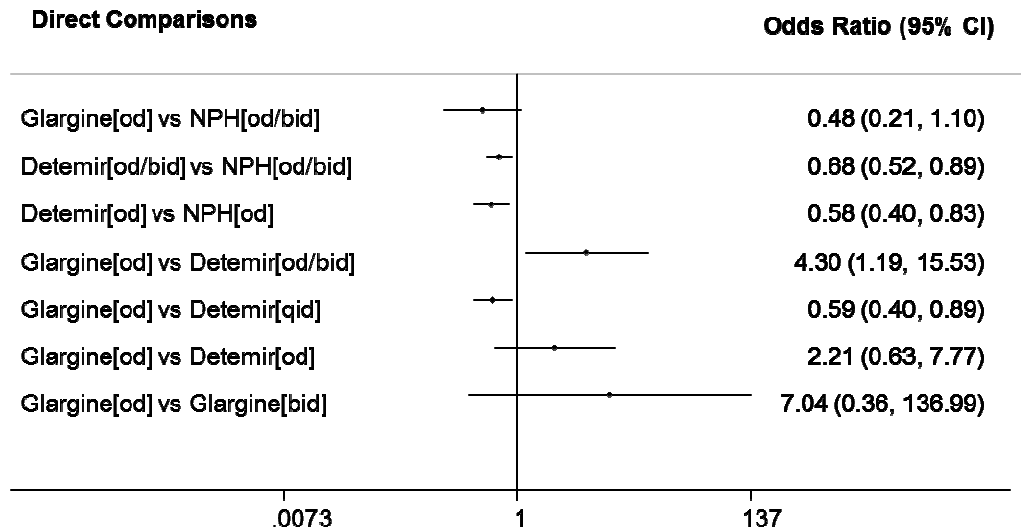


---

\*16 RCTs including 5697 patients contributing to the random effects pairwise meta-analysis assuming that each comparison has a different amount of heterogeneity. The heterogeneity has been estimated using the restricted Maximum Likelihood method.

\*\* Bid - twice daily; Od - once daily; Qid - four times daily.

---

**Appendix 30 | Comparison adjusted funnel plot for severe hypoglycemia\***

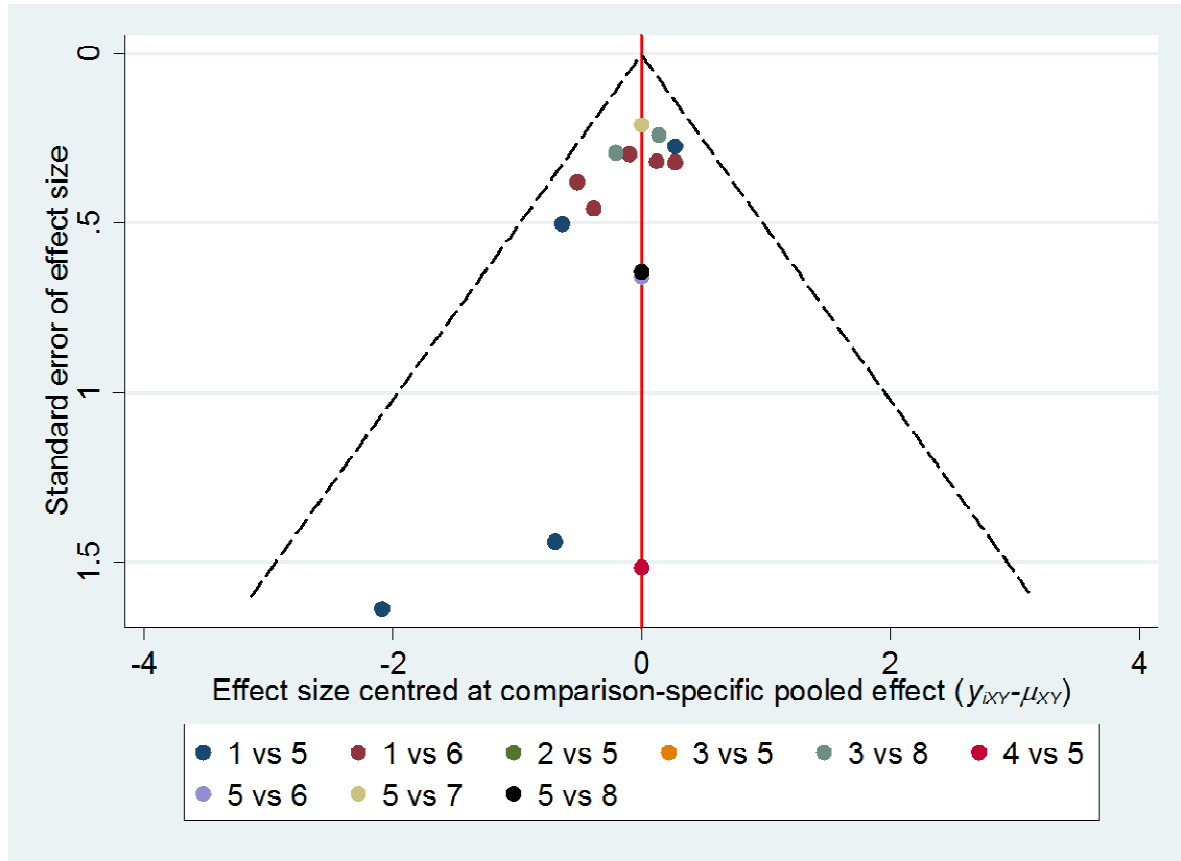

\*16 RCTs including 5697 patients contributing to the comparison adjusted funnel plot.

\*\* Bid - twice daily; Od - once daily; Qid - four times daily.



**Appendix 31 | Comparison adjusted funnel plot for severe hypoglycemia\***

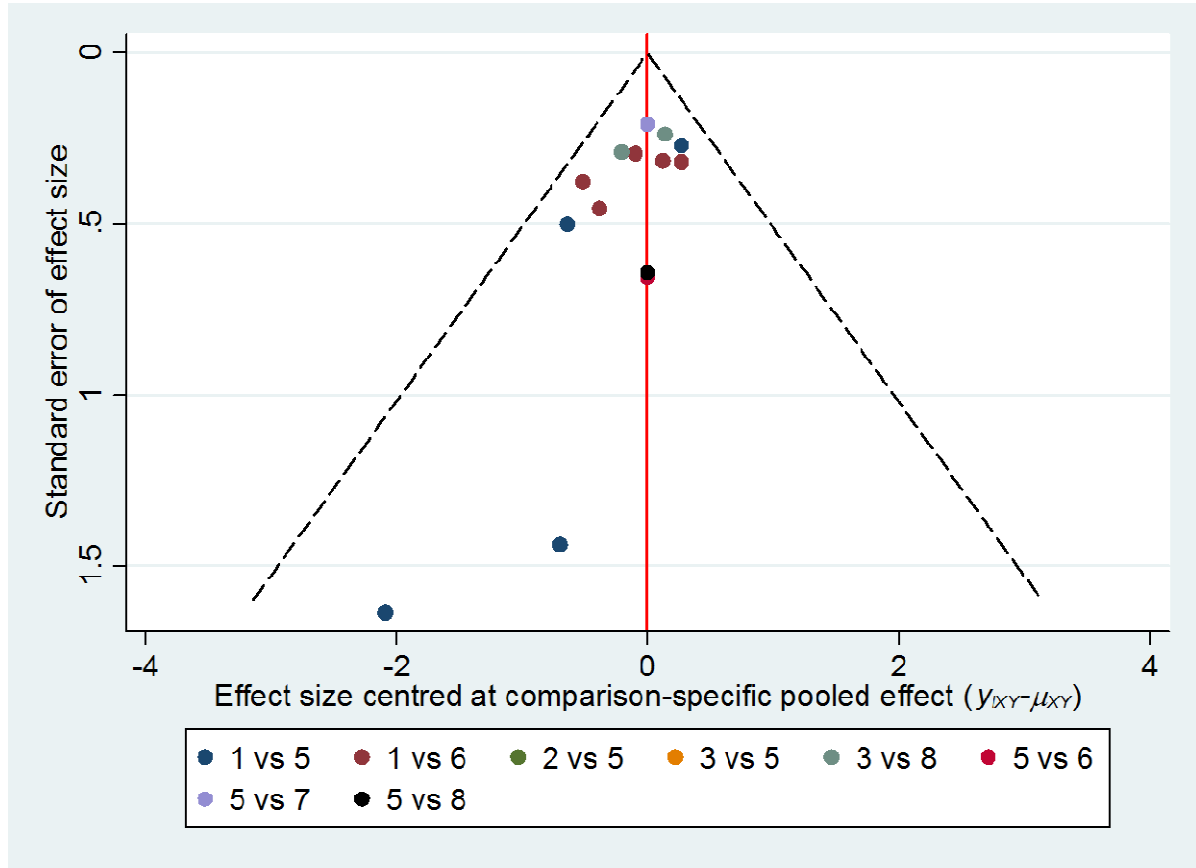

\*16 RCTs including 5697 patients contributing to the comparison adjusted funnel plot, restricting only to general comparisons: NPH vs. Glargine; NPH vs. Detemir; Detemir vs. Glargine

\*\* Bid - twice daily; Od - once daily; Qid - four times daily.

**Appendix 32 | Loop-Specific method for severe hypoglycemia\***

| Closed Loop                              | Inconsistency Factor (ROR) | 95%CI (truncated) | Loop-specific Heterogeneity |
|------------------------------------------|----------------------------|-------------------|-----------------------------|
| NPH[od/bid]-Detemir[od/bid]-Glargine[od] | 7.645                      | (1.82,32.18)      | 0.009                       |

1 3 8 21 55

\*16 RCTs including 5697 patients contributing to the loop-specific method for severe hypoglycemia.

\*\* Bid - twice daily; Od - once daily; Qid - four times daily.

**Appendix 33 | Network meta-analysis estimates for severe hypoglycemia\***

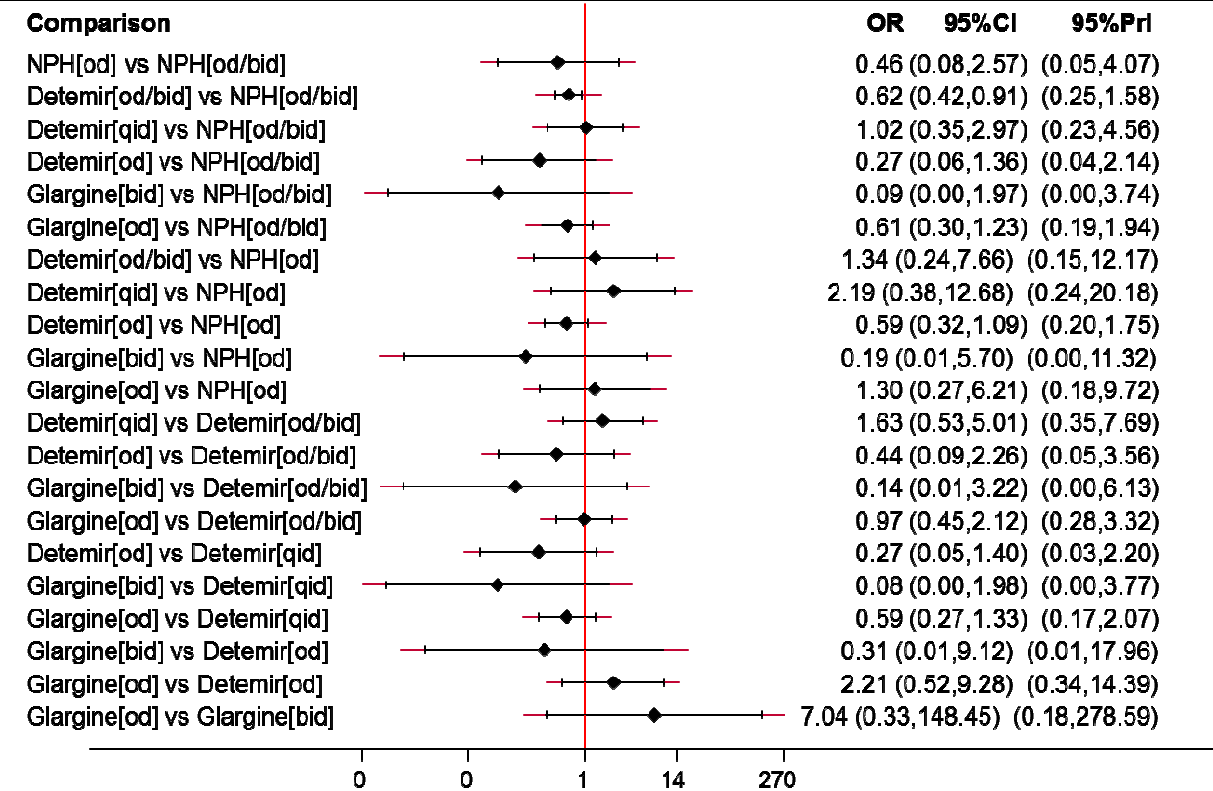

\*16 RCTs including 5697 patients contributing to the network meta-analysis estimates for severe hypoglycemia.

\*\* Bid - twice daily; Od - once daily; Qid - four times daily.

**Appendix 34 | Treatment Ranking: Probabilities of being the best for severe hypoglycemia\***

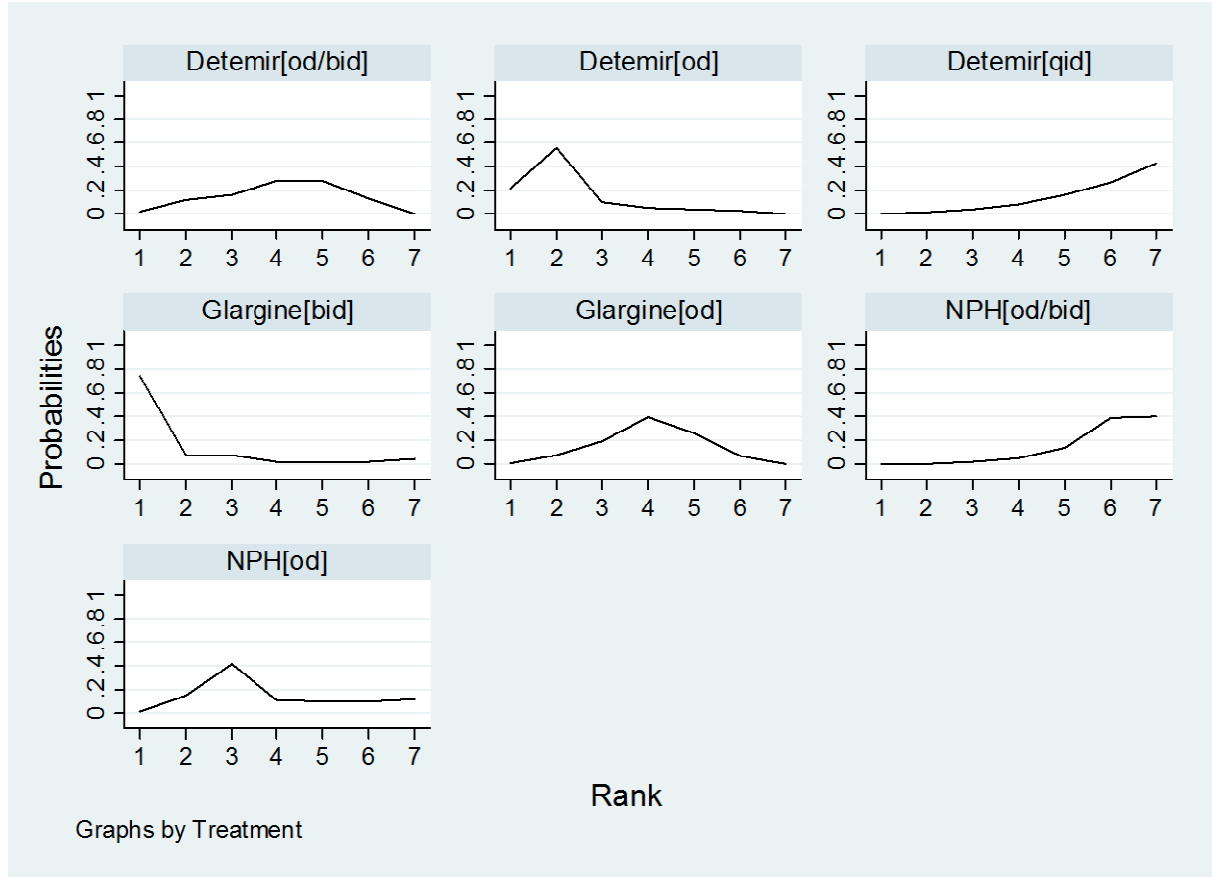

\*16 RCTs including 5697 patients contributing to the treatment ranking analysis showing the probabilities of being the best for severe hypoglycemia.

\*\* Bid - twice daily; Od - once daily; Qid - four times daily.

**Appendix 35 | Treatment Ranking: Probabilities of being the best for severe hypoglycemia\***

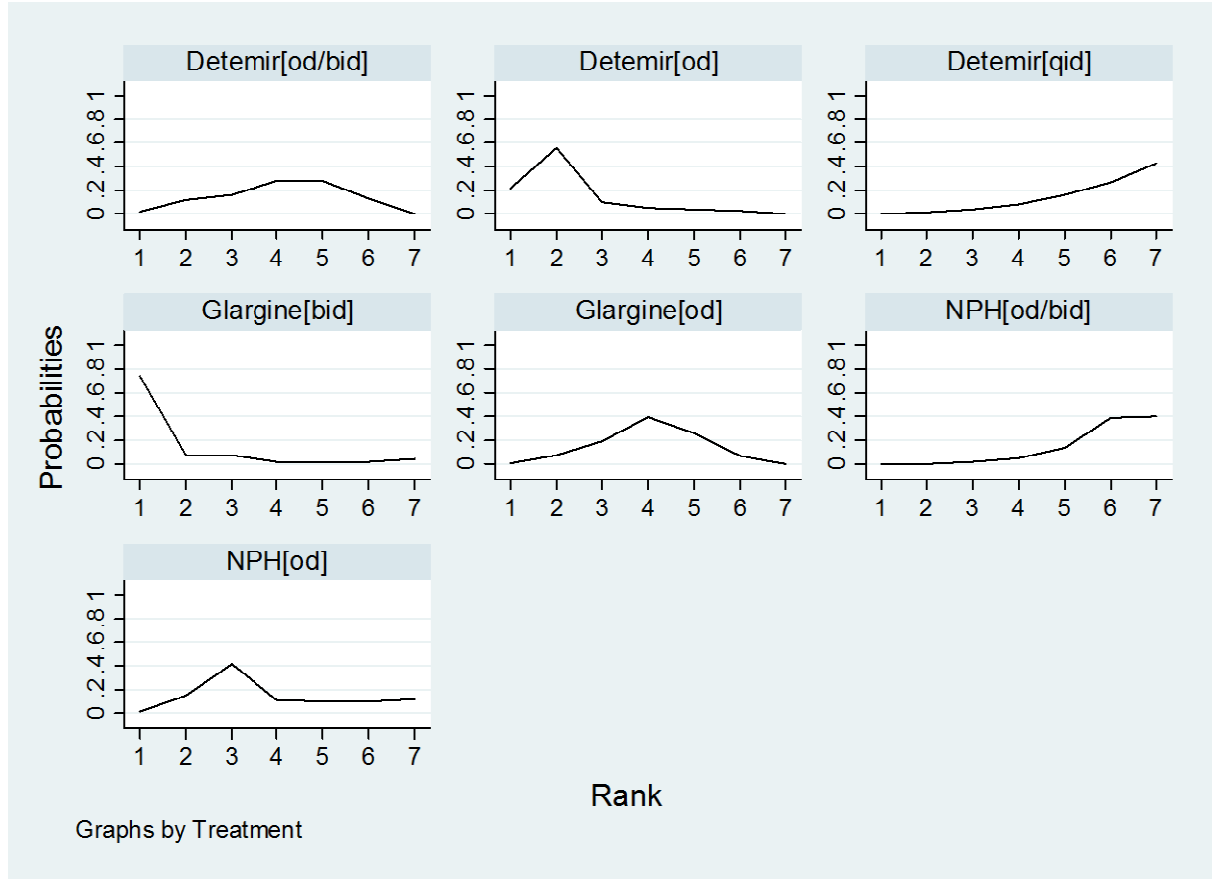

\*16 RCTs including 5697 patients contributing to the treatment ranking analysis using the SUCRA approach.

\*\*Bid - twice daily; Od - once daily; Qid - four times daily. SUCRA - surface under the cumulative ranking curve. The SUCRA allows identifying which treatment is the most effective overall and can be interpreted as 1 = treatment is certain to be the best and 0 = treatment is certain to be the worst.

**Appendix 36 | Definitions of severe hypoglycemia**

| <b>Study</b>                      | <b>Definition of severe hypoglycemia</b>                                                                                                                                                                                                                                                                                                          |
|-----------------------------------|---------------------------------------------------------------------------------------------------------------------------------------------------------------------------------------------------------------------------------------------------------------------------------------------------------------------------------------------------|
| Mathiesen, <sup>29</sup> 2012     | “Major hypoglycemia was defined as an episode in which the subject was unable to treat herself”                                                                                                                                                                                                                                                   |
| Renard, <sup>30</sup> 2011        | “Severe hypoglycemia was defined as an episode in which the patient’s condition requires the indispensable assistance of a third person and is associated with blood glucose of < 1.98 mmol/L or a quick recovery after ingestion of sugar or intravenous glucose or glucagon administration”                                                     |
| Zachariah, <sup>31</sup> 2011     | “Major hypoglycemia episodes: defined as patients unable to treat themselves”                                                                                                                                                                                                                                                                     |
| Bolli, <sup>35</sup> 2009         | “Severe hypoglycemia an event with symptoms consistent with hypoglycemia, during which the participant required the assistance of another person, or with prompt recovery after oral carbohydrate, intravenous glucose or glucagon administration.”                                                                                               |
| Heller, <sup>32</sup> 2009        | “Hypoglycemic episodes were defined as <i>major</i> (the patient could not treat the episode by himself/herself)”                                                                                                                                                                                                                                 |
| Bartley, <sup>34</sup> 2008       | Severe hypoglycemia unspecified                                                                                                                                                                                                                                                                                                                   |
| Chatterjee, <sup>36</sup> 2007    | “Severe hypoglycemia was defined as a hypoglycemic episode requiring third-party assistance and/or intravenous glucose or intramuscular glucagon”                                                                                                                                                                                                 |
| Pieber, <sup>39</sup> 2007        | “Hypoglycemic episodes were recorded throughout the trial and were classified as severe if help from a third party was required”                                                                                                                                                                                                                  |
| Ashwell, <sup>41</sup> 2006       | “Hypoglycemia was classified as anytime severe (requiring third party assistance)”                                                                                                                                                                                                                                                                |
| Kolendorf, <sup>42</sup> 2006     | “Hypoglycemic episodes were classified as <i>severe</i> if help from others was required”                                                                                                                                                                                                                                                         |
| De Leeuw, <sup>43</sup> 2005      | “Hypoglycemic episodes were classified as major [an episode with severe central nervous system (CNS) symptoms consistent with hypoglycemia, in which the subject was unable to treat himself/herself and which had one of the following characteristics: BG recorded as <2.8 mmol/l or symptom reversal achieved with food, glucose or glucagon]” |
| Fulcher, <sup>44</sup> 2005       | “A severe event was one where symptoms consistent with hypoglycemia required the assistance of another person and was associated with a BG level <2.8 mmol/L or prompt recovery after oral carbohydrate, i.v. glucose or s.c. glucagon administration”                                                                                            |
| Home, <sup>46</sup> 2004          | Hypoglycemic episodes were classified as major (requiring assistance from another person)”                                                                                                                                                                                                                                                        |
| Porcellati, <sup>47</sup> 2004    | “Hypoglycemia was considered ...severe when the episode required external help (any kind)”                                                                                                                                                                                                                                                        |
| Russell-Jones, <sup>48</sup> 2004 | “A hypoglycemic episode was classified as <i>major</i> if the patient was unable to self treat”                                                                                                                                                                                                                                                   |
| Standl, <sup>49</sup> 2004        | “Hypoglycemia was defined as major if third-party help was required”                                                                                                                                                                                                                                                                              |
| Rossetti, <sup>50</sup> 2003      | “Hypoglycemia was considered severe when the episode required any kind of external help. hypoglycemia was defined as any episode associated with measurement of blood glucose <4.0 mmol/l irrespective of symptoms, as previously reported”                                                                                                       |
| Vague, <sup>51</sup> 2003         | “Hypoglycemia episodes were classified as “major” if assistance to treat was required.”                                                                                                                                                                                                                                                           |
| Pieber, <sup>52</sup> 2000        | “Episodes of hypoglycemia(2.8 mmol/l) were recorded by the patients and were classified as severe (requiring assistance).Hypoglycemia was reported as a serious adverse event when it led to coma or to a car accident”                                                                                                                           |
| Raskin, <sup>53</sup>             | “Severe hypoglycemia was defined as an event with symptoms consistent with                                                                                                                                                                                                                                                                        |

|                                                                          |                                                                                                                                                                                                                                                                    |
|--------------------------------------------------------------------------|--------------------------------------------------------------------------------------------------------------------------------------------------------------------------------------------------------------------------------------------------------------------|
| 2000                                                                     | hypoglycemia in which the subject required assistance from another person and which was accompanied by a blood glucose level <36.0 mg/dl (2.0 mmol/l) or associated with prompt recovery after oral carbohydrate, intravenous glucose, or glucagon administration” |
| Ratner, <sup>54</sup><br>2000<br>(CR:<br>Hershon, <sup>66</sup><br>2004) | “Any episode of hypoglycemia that met the criteria for a serious adverse event (e.g., death, a life-threatening episode, hospitalization, or medical intervention to prevent permanent impairment) was considered to be a treatment-related adverse event”         |
| CR – companion report.                                                   |                                                                                                                                                                                                                                                                    |

| <b>Appendix 37   Randomized clinical trials included in our review versus previous reviews</b> |                           |                          |                            |                          |                   |
|------------------------------------------------------------------------------------------------|---------------------------|--------------------------|----------------------------|--------------------------|-------------------|
| <b>Study</b>                                                                                   | <b>Monami<sup>4</sup></b> | <b>Vardi<sup>6</sup></b> | <b>Sanches<sup>5</sup></b> | <b>Tran<sup>67</sup></b> | <b># patients</b> |
| Mathiesen, <sup>29</sup> 2012                                                                  | No                        | No                       | No                         | No                       | 340               |
| Renard, <sup>30</sup> 2011                                                                     | No                        | No                       | No                         | No                       | 135               |
| Zachariah, <sup>31</sup> 2011                                                                  | No                        | No                       | No                         | No                       | 23                |
| Heller, <sup>32</sup> 2009                                                                     | No                        | No                       | Yes                        | No                       | 447               |
| Le Floch, <sup>33</sup> 2009                                                                   | No                        | No                       | No                         | No                       | 512               |
| Bartley, <sup>34</sup> 2008                                                                    | Yes                       | No                       | Yes                        | No                       | 497               |
| Bolli, <sup>35</sup> 2009                                                                      | No                        | No                       | Yes                        | No                       | 175               |
| Chatterjee, <sup>36</sup> 2007                                                                 | Yes                       | Yes                      | No                         | No                       | 60                |
| Pesic, <sup>37</sup> 2007                                                                      | No                        | No                       | No                         | No                       | 48                |
| Philippo, <sup>38</sup> 2007 <sup>a</sup>                                                      | Yes                       | No                       | No                         | No                       | 113               |
| Pieber, <sup>39</sup> 2007                                                                     | Yes                       | No                       | Yes                        | No                       | 322               |
| Radman, <sup>40</sup> 2007                                                                     | Yes                       | No                       | No                         | No                       | 56                |
| Ashwell, <sup>41</sup> 2006                                                                    | No                        | Yes                      | No                         | No                       | 20                |
| Kolendorf, <sup>42</sup> 2006                                                                  | No                        | No                       | No                         | Yes                      | 130               |
| De Leeuw, <sup>43</sup> 2005                                                                   | Yes                       | Yes                      | Yes                        | Yes                      | 315               |
| Fulcher, <sup>44</sup> 2005                                                                    | No                        | Yes                      | Yes                        | Yes                      | 125               |
| Pieber, <sup>45</sup> 2005                                                                     | No                        | No                       | Yes                        | Yes                      | 400               |
| Home, <sup>46</sup> 2004                                                                       | Yes                       | Yes                      | Yes                        | Yes                      | 408               |
| Porcellati, <sup>47</sup> 2004                                                                 | Yes                       | Yes                      | Yes                        | Yes                      | 121               |
| Russell-Jones, <sup>48</sup> 2004                                                              | Yes                       | Yes                      | Yes                        | Yes                      | 749               |
| Standl, <sup>49</sup> 2004                                                                     | Yes                       | No                       | No                         | Yes                      | 289               |
| Rossetti, <sup>50</sup> 2003                                                                   | No                        | Yes                      | No                         | Yes                      | 51                |
| Vague, <sup>51</sup> 2003                                                                      | Yes                       | Yes                      | Yes                        | Yes                      | 448               |
| Pieber, <sup>52</sup> 2000                                                                     | No                        | Yes                      | No                         | Yes                      | 333               |
| Raskin, <sup>53</sup> 2000                                                                     | Yes                       | Yes                      | Yes                        | Yes                      | 619               |
| Ratner, <sup>54</sup> 2000<br>(CR: Hershon, <sup>66</sup> 2004)                                | Yes                       | Yes                      | Yes                        | Yes                      | 534               |
| Rosenstock, <sup>55</sup> 2000                                                                 | No                        | Yes                      | Yes                        | Yes                      | 256               |



**Appendix 38 | Randomized clinical trials excluded in our review that were included in previous reviews**

| <b>Study</b>    | <b>Monami<sup>4</sup></b> | <b>Vardi<sup>6</sup></b> | <b>Sanches<sup>5</sup></b> | <b>Tran<sup>67</sup></b> | <b>Reason for exclusion</b>          |
|-----------------|---------------------------|--------------------------|----------------------------|--------------------------|--------------------------------------|
| Hassan, 2008    | Yes                       | No                       | No                         | No                       | Children                             |
| Robertson, 2007 | Yes                       | Yes                      | No                         | No                       | Children                             |
| Home, 2005      | Yes                       | Yes                      | Yes                        | Yes                      | Pre-mixed insulin therapy            |
| Kawamura, 2005  | No                        | No                       | No                         | Yes                      | Children                             |
| Kudva, 2005     | No                        | No                       | No                         | Yes                      | No relevant comparator               |
| Robertson, 2004 | No                        | No                       | No                         | Yes                      | Children                             |
| Hermansen, 2004 | No                        | Yes                      | Yes                        | Yes                      | Pre-mixed insulin therapy            |
| Murphy, 2003    | No                        | Yes                      | No                         | No                       | Children                             |
| Schober, 2002   | Yes                       | No                       | No                         | Yes                      | Children                             |
| Hermansen, 2001 | No                        | Yes                      | No                         | Yes                      | Pre-mixed insulin therapy            |
| Schober, 2001   | No                        | Yes                      | No                         | No                       | Children                             |
| Garg, 1998      | No                        | No                       | No                         | Yes                      | Abstract not found, older than 10yrs |
| Tunbridge, 1989 | No                        | Yes                      | No                         | No                       | No relevant intervention             |
| Francis, 1986   | No                        | Yes                      | No                         | No                       | No relevant comparator               |
| NN304-1476      | Yes                       | No                       | No                         | No                       | Japanese article, can't translate    |
| NN304-1604      | Yes                       | No                       | No                         | No                       | Children                             |
